# 1 **Genomes of Thaumarchaeota from deep sea sediments reveal specific** 2 **adaptations of three independently evolved lineages**

3

4 **Running title: Genomes of Thaumarchaeal lineages from deep sea sediments**

5

6

7 **Melina Kerou<sup>1\*</sup>, Rafael I. Ponce-Toledo<sup>1\*</sup>, Rui Zhao<sup>2#</sup>, Sophie S. Abby<sup>1§</sup>, Miho Hirai<sup>4</sup>, Hidetaka**  
8 **Nomaki<sup>4</sup>, Yoshihiro Takaki<sup>4</sup>, Takuro Nunoura<sup>3</sup>, Steffen L. Jørgensen<sup>2</sup>, Christa Schleper<sup>1</sup>**

9 <sup>1</sup> Department of Functional and Evolutionary Ecology, Archaea Biology and Ecogenomics Unit,  
10 University of Vienna, Althanstrasse 14, 1090, Vienna, Austria.

11 <sup>2</sup> Department of Earth Science, K.G. Jebsen Centre for Deep Sea Research, University of Bergen,  
12 Bergen, Norway

13 <sup>3</sup> Research Center for Bioscience and Nanoscience (CeBN), Japan Agency for Marine-Earth Science  
14 and Technology (JAMSTEC), 2-15 Natsushima-cho, Yokosuka, 237-0061, Japan.

15 <sup>4</sup> Super-cutting-edge Grand and Advanced Research (SUGAR) Program, X-star, Japan Agency for  
16 Marine-Earth Science and Technology (JAMSTEC), 2-15 Natsushima-cho, Yokosuka, 237-0061,  
17 Japan.

18 <sup>#</sup>present address: School of Marine Science and Policy, University of Delaware, Lewes, Delaware  
19 19958, USA

20 <sup>§</sup> present address: Univ. Grenoble Alps, CNRS, Grenoble INP, TIMC-IMAG, 38000 Grenoble, France.

21 <sup>\*</sup> contributed equally

22

23

24

25 **Abstract**

26

27 Marine sediments represent a vast habitat for complex microbiomes. Among these, ammonia oxidizing  
28 archaea (AOA) of the phylum Thaumarchaeota are one of the most common, yet little explored  
29 inhabitants, that seem extraordinarily well adapted to the harsh conditions of the subsurface biosphere.

30 We present 11 metagenome-assembled genomes of the most abundant AOA clades from sediment cores  
31 obtained from the Atlantic Mid-Ocean ridge flanks and Pacific abyssal plains. Their phylogenomic  
32 placement reveals three independently evolved clades within the order *Ca.* Nitrosopumilales, of which

33 no cultured representative is known yet. In addition to the gene sets for ammonia oxidation and carbon

34 fixation known from other AOA, all genomes encode an extended capacity for the conversion of

35 fermentation products that can be channeled into the central carbon metabolism, as well as uptake of

36 amino acids probably for protein maintenance or as an ammonia source. Two lineages encode an

37 additional (V-type) ATPase and a large repertoire of gene repair systems that may allow to overcome  
38 challenges of high hydrostatic pressure. We suggest that the adaptive radiation of AOA into marine  
39 sediments occurred more than once in evolution and resulted in three distinct lineages with particular  
40 adaptations to this extremely energy limiting and high-pressure environment.

41

42

### 43 **Introduction**

44

45 Ammonia oxidizing archaea (AOA) comprise one of the most successful archaeal phyla having  
46 colonized almost every imaginable oxic environment of the planet where they emerge as key players in  
47 the nitrogen cycle [1–6]. This includes the marine environment where they dominate archaeal  
48 communities associated with oxic sediments ranging from shallow estuaries to the open ocean [7–12],  
49 and from the surface layers all the way into the deep oceanic crust [13–15]. In these ecosystems they  
50 seem to play a critical role in the transformation of nitrogen compounds and control its partitioning into  
51 the bottom ocean and the underlying oceanic crust [12, 14–19]).

52

53 Studies from the North Atlantic and Pacific show that the composition of the sedimentary AOA  
54 population differs drastically from that in the overlying water suggesting distinct ecophysiological  
55 potential to colonise sedimentary environments, albeit all were found to belong to the order  
56 *Nitrosopumilales* (NP) [20]. Whereas the *amoA*-NP-gamma clade seems to be dominant and  
57 omnipresent in these oceans, irrespective of water depths, the *amoA*-NP-alpha clade represents the most  
58 abundant ecotypes in deep ocean waters [6, 7, 21–27] (nomenclature based *amoA* gene classification  
59 [28]). In contrast, dominant phylotypes in deep-sea sediments belong to the *amoA*-NP-theta and *amoA*-  
60 NP-delta clades [11, 12]. In addition, in cases of oligotrophic oceanic regions, these were detected  
61 throughout the sediment column and further into the underlying basaltic crust, even at depth where  
62 oxygen is below detection [7, 10–12, 14, 15]. In these, sites, they exhibit peaks of abundance and  
63 diversity at oxic/anoxic transition zones where increased energy availability is suggested to sustain the  
64 higher biomass of nitrifiers [12]. The abundance and distribution of *amoA*-NP-theta and -delta in the  
65 energy-starved subsurface suggest that they have adapted and evolved differently than their pelagic  
66 counterparts. These clades represent a yet unexplored diversity within *Nitrosopumilales*, and so far have  
67 no cultivated or genomic representative [28].

68

69 It has been suggested that the AOA common ancestor arose in terrestrial habitats (probably hot springs)  
70 where the AOA lineages diversified and then occupied different biomes (e.g. soils, hot springs and  
71 freshwater environments) before conquering estuarine and marine shallow water environments and  
72 finally, radiating into deeper waters as a result of the oxygenation of the deep ocean during the  
73 Neoproterozoic [29, 30] (Abby et al., submitted). AOA are generally well equipped for the manifold

74 challenges of the oxic deep-sea surface and subsurface environment. They encode the most energy-  
75 efficient aerobic carbon fixation pathway [31] making them important primary producers in these  
76 environments [32, 33], and their high affinity for ammonia would enable them to utilize this scarce  
77 resource [34]. Nevertheless, deep pelagic as well as benthic AOA populations are reported to have the  
78 capability for mixotrophy as well, as indicated by uptake of labelled compounds and through the  
79 detection of uptake/assimilation genes for organic carbon and nitrogen compounds by shotgun  
80 metagenomics [10, 16, 23, 24, 33, 35–37]. Stimulation of autotrophic CO<sub>2</sub> fixation by organic carbon  
81 was also shown by isotope labelling studies [32]. In the absence of genomic context however, virtually  
82 nothing of the above can be extrapolated to the metabolic potential or adaptations of ecotypes that  
83 dominate deep marine sediments, nor can their ecological boundaries be interpreted.

84

85 In this study, we address the question of what adaptations enabled specific AOA clades to inhabit  
86 bathyal and abyssal (i.e. deep-sea) marine sediments, and the significance of this in the context of  
87 thaumarchaeal evolution. To this end, we obtained the first high-quality metagenome-assembled  
88 genomes (MAGs) belonging to the so-far uncharacterized *amoA*-NP-theta and *amoA*-NP-delta clades  
89 from sediment cores obtained from the Mid-Atlantic Ridge flanks, and from the oligotrophic Pacific  
90 Ocean. We also describe two MAGs associated with a novel, deep-branching clade within the  
91 *Nitrosopumilales*, which we designate *amoA*-NP-iota (previously NP - *insertae sedis* [28]). The pivotal  
92 phylogenetic position of the latter and the distribution of all three clades in phylogenomic trees enables  
93 us to shed light on the evolutionary diversification of AOA into marine sediments, which seems much  
94 more complex than previously assumed and reveals unique, similar, and also overlapping adaptive  
95 strategies in all three clades.

96

## 97 **Materials and Methods**

98

### 99 **Sampling of Atlantic and Pacific sediments**

100

101 Oligotrophic sediment cores were retrieved from mid-ocean ridge flanks in the Atlantic Ocean: Hole  
102 U1383E (22°48.1'N, 46°03.2'W, 4425 m water depth) from North Pond by advanced piston coring  
103 during the International Ocean Drilling Program (IODP) Expedition 336 (2011), and GS14-GC08  
104 (71°58.0' N, 0°6.1' E, 2476 m water depth) by gravity coring from the east flank of the central Mohs  
105 Ridge (2014) (Fig. 1a). Genomic DNA from four sediment horizons in each core were selected for  
106 metagenome sequencing, based on the published porewater geochemical data and 16S rRNA gene  
107 profiles [12, 38]. In particular, sediments of 0.1 m (oxic), 10.0 m (oxic), 22.0 m (oxic-anoxic transition  
108 zone; OATZ), and 29.5 m (anoxic-oxic transition zone; AOTZ) were selected from U1383E. Sediments  
109 of 0.1 meters below the seafloor (mbsf (oxic), 1.0 m (OATZ), 1.6 mbsf (nitrate-ammonium transition

110 zone), and 2.5 mbsf (Mn-reduction zone) were selected from GS14-GC08. Detailed information about  
111 sampling sites, sampling procedure, 16S rRNA gene profiles and porewater analysis was published in  
112 [12, 38].

113

114 Sediment cores (YK1309-1N and YK1312-12N) from the Pacific abyssal plain were collected using a  
115 push corer with a manned submersible *Shinkai6500* during the JAMSTEC cruises YK13-09 (September  
116 2013: 01°15.0'N, 163°14.9'E, 4277 m water depth) and YK13-12 (November 2013: 11°59.9'N,  
117 153°59.9'E, 5920 m water depth) of the *R/V Yokosuka*, respectively. Two sections from each core were  
118 selected for shotgun metagenomic sequencing: YK1309-1N-S000 (0-1 cmbsf), YK1309-1N-S300 (30-  
119 35 cmbsf), YK1312-12N-S010 (1-2 cmbsf) and YK1312-12N-S200 (20-25 cmbsf).

120

121 DNA of all samples was prepared using standard techniques and was sequenced on Illumina HiSeq2500,  
122 16S rRNA gene amplicons were generated and sequenced using standard procedures (see Suppl.  
123 Material). Detailed information about sampling sites, sampling procedure, and geochemical analyses  
124 are also shown in Suppl. Material.

125

## 126 **Assembly and comparative genomics**

127

128 All sequencing data were processed to remove illumina adapters and low quality reads using  
129 Trimmomatic [39] before *de novo* assembly using MEGAHIT [40] (k-mer length of 27-117). Binning  
130 of contigs of Pacific metagenomes was performed applying a contig dereplication and binning  
131 optimization tool [41] based on the binning output of CONCOCT [41], MetaBAT [42] and MaxBin2  
132 [43] while contigs of Atlantic samples were binned with MaxBin2 [43] followed by a sequence of  
133 refinement steps for the Thaumarchaeal bins (see supplementary methods). Completeness and  
134 contamination of Pacific and Atlantic bins were evaluated with CheckM (“lineage\_wf” parameter) [44].  
135 Assemblies are available on NCBI (accession numbers pending).

136

137 A dataset consisting of 163,852 predicted proteins from 85 genomes (11 metagenome-assembled  
138 genomes (MAGs) reported here, 31 complete and near-complete AOA genomes and 43 MAGs or  
139 single-amplified genomes (SAGs) from NCBI or IMG) was collected for this study (Table S1).  
140 Annotation of the MAGs assembled in this study was performed automatically using the Microscope  
141 annotation platform from Genoscope [45], followed by extensive manual curation. NCBI annotations  
142 were supplemented with arCOG assignments from the archaeal Clusters of Orthologous Genes database  
143 (2018 release) [46] using COGsoft [47] (e-value of  $10^{-10}$ ). We clustered the protein dataset into protein  
144 families based on sequence identity (35 %) and alignment coverage (70 %) using CD-Hit V4.8.1 [48]  
145 (“-c 0.35 -aL 0.7 -aS 0.7”) (Table S3).

146

## 147 **Selection of markers and phylogenomic tree**

148

149 The identification of markers to perform the phylogenomic tree reconstruction was based on the  
150 phylogenomic workflow proposed by [49] (E-value  $10^{-10}$ ) using the archaeal single-copy gene  
151 collection [50]. We selected 79 markers (Table S2), present in at least 70 of the 85 genomes used in this  
152 study. Each protein family was aligned using MAFFT v7 (“--maxiterate 1000 --localpair”) [51] and  
153 trimmed with BMGE [52]. The concatenated alignment was used to reconstruct a Maximum likelihood  
154 phylogenomic tree in IQTREE (v2.0-rc1) [53] under the LG+C20+F+G model with 1,000 ultrafast  
155 bootstrap replicates. For *amoA* phylogeny and detailed methodological procedures, see Supplementary  
156 Material.

157

## 158 **Results and Discussion**

159

### 160 **Distribution of AOA in deep marine sediments**

161

162 We examined the overall community structure of AOA (all affiliated to the family *Ca.*  
163 *Nitrosopumilaceae*) in these sediments by analyzing 16S rRNA gene amplicon sequencing data  
164 generated in this study for the Pacific cores and previously described for the Atlantic cores [12]. AOA  
165 communities in sediment horizons deeper than 10 cm were all dominated by the so-called 16S-NP-eta  
166 and/or 16S-NP-epsilon and 16S-NP-alpha clades [55], which together correspond to the *amoA*-NP-  
167 theta clade (Fig. 1b) [28]. In addition, AOA affiliated to the 16S-NP-epsilon clade (corresponding to  
168 the *amoA*-NP-delta clade, Fig 2a) were also repeatedly detected with percentages <25% in the upper  
169 portions of these cores (Fig. 1b). Finally, the 16S-NP-lambda clade (now renamed to *amoA*-NP-iota,  
170 see below) was also detected as a minor clade in all cores except YK1312-12N, but was notably  
171 abundant in the uppermost horizon of GS14-GC08 (29% of the total AOA community, Fig. 1b).

172

### 173 **Phylogenomic analysis and taxonomic placement reveal MAGs from three independent *amoA*** 174 **clades**

175

176 We obtained a total of 11 AOA metagenome-assembled genomes (MAGs), 9 from Atlantic and 2 from  
177 Pacific sediment samples (sequenced horizons are marked by stars in Fig. 1b). Despite high sequencing  
178 depths and high AOA abundance in the sample, based on 16S rRNA gene reads in the metagenomes  
179 (10 - 16 % in the Pacific cores and 6.8-18.8% in the Atlantic cores), generation of good quality bins  
180 was extremely challenging, possibly due to high microdiversity (41 OTUs) within *Ca. Nitrosopumilales*  
181 as observed earlier [12]. Eventually we obtained 4 MAGs with >90 % completeness and 3 MAGs with

182 >80 % completeness, all with contamination levels  $\leq 5\%$ , which we consider high quality MAGs in this  
183 study, as well as four additional medium quality MAGs (66 to 76% completeness, up to 6.3%  
184 contamination level) (Table1). The MAGs genome sizes (0.61 to 1.52 Mb) and GC contents ( $34.66 \pm$   
185  $0.72\%$ ) are in accordance with previous reports of free-living *Ca. Nitrosopumilales* [56].

186

187 In order to study the evolution of AOA and place our deep marine sediments-derived MAGs in a  
188 phylogenetic context, we reconstructed a maximum-likelihood (ML) phylogenomic tree (Fig. 2a) using  
189 79 concatenated single-copy markers from our entire dataset of 85 complete genomes, MAGs and SAGs  
190 representing a broad diversity of habitats (Table S1).

191

192 In addition, we performed an *amoA*-based phylogeny as in [28] in order to assign a taxonomical rank  
193 and a respective AOA clade to our MAGs (Fig. 2b). Both trees showed similar clustering of MAGs  
194 into *Ca. Nitrosopumilales* subclades except for NPMR\_NP\_delta\_1 (see discussion in Supplementary  
195 Information) which based on the *amoA* tree clustered within the *amoA*-NP-theta clade but the more  
196 robust phylogenomic analysis strongly suggests that it belongs to the *amoA*-NP-delta subclade. The  
197 only 16S rRNA gene recovered in MAG NPMR\_NP\_theta\_3 is affiliated with a subclade of 16S-NP-  
198 alpha exclusively found in marine sediment (not shown).

199

200 Our phylogenomic tree revealed that the 11 AOA MAGs reported here represent the dominant AOA  
201 observed in our study (Fig. 1b) and form three well supported monophyletic groups, of which no  
202 cultured representative has been reported yet (Fig. 2a). Six MAGs represent the first genomic  
203 assemblies from the *amoA*-NP-theta lineage, one of the most dominant AOA groups in marine  
204 sediments and also found to be abundant in the crust below [14, 28]. Three MAGs are affiliated to  
205 *amoA*-NP-delta, the second most abundant AOA clade in marine sediments, and are the first marine  
206 sediment representatives of this clade, which includes a single other MAG (Archaeon CSP1) assembled  
207 from river aquifer sediments [57].

208

209 Two bins (NPMR\_NP\_iota\_1 and YK1309\_NP\_iota) clustered together forming a third sediment-  
210 dwelling clade, sister to all *Ca. Nitrosopumilales*, which earlier escaped taxonomic assignment as it was  
211 only identified based on singular *amoA* sequences and hence had been designated *incertae sedis* [28].  
212 Pairwise average nucleotide identity (ANI) comparisons (Fig. S2), indicate that these two bins share >  
213 70 % ANI with the other NP-MAGs recovered in this study (*amoA*-NP-delta and *amoA*-NP-theta  
214 MAGs sharing 73 - 79 % ANI). A comparison of conserved protein families among all NP subclades  
215 indicated that this group harbors 320 out of 336 protein families that seem to be part of the *Ca.*  
216 *Nitrosopumilales* core proteome, as opposed to only 260 of these protein families being present in the  
217 *Ca. Nitrosotaleales*, the sister lineage to all NP (Fig. 3). Moreover, environmental *amoA* sequences

218 suggested that this clade might be restricted to deep-sea sediments, an ecological specialization only  
219 found in *Ca. Nitrosopumilales*. Taken together, this early-branching clade seems to be a new NP  
220 subclade and we propose the designation *amoA-NP-iota* (as it forms the ninth NP-clade following the  
221 taxonomy of [28]).

222

### 223 **Three independent radiations of AOA into marine sediments**

224

225 While MAGs and SAGs of AOA from bathypelagic (1000-4000m) to abyssopelagic (4000-6000m) and  
226 hadopelagic (6000-11000m) environments have been reported previously [23, 24, 58] and shotgun  
227 metagenomic analyses of deep-sea sediments have been performed [10, 59, 60], the MAGs reported in  
228 this study represent to our knowledge the first high-quality AOA genomes from bathyal and abyssal  
229 sediments (> 2000 m depth). Together with our taxon-enriched phylogenomic analyses they shed new  
230 light on the ecological transitions and niche differentiation undergone by AOA.

231

232 While our phylogenomic tree supports that AOA likely appeared in terrestrial habitats first (Fig. 2a),  
233 the sequence and number of colonization events of marine environments seem to be more complex than  
234 previously proposed [29]. Importantly, our results suggest that both the deep-water adapted AOA as  
235 well as the deep-sediment adapted AOA are polyphyletic. The colonization of deep waters, i.e. pelagic  
236 organisms, might have occurred independently at least twice in the evolution of the *Ca.*  
237 *Nitrosopumilales*, once at the origin of *amoA-NP-alpha* clade and the other during the diversification  
238 of *amoA-NP-gamma* (Fig. 2a). Interestingly, the *amoA-NP-gamma* clade which is one of the most  
239 diverse *Ca. Nitrosopumilales* subclades [28] has undergone particular habitat transitions and niche  
240 occupation [28]. Distinct shallow water *amoA-NP-gamma* species have established independently  
241 symbiotic associations with sponges [56, 61] while the sub-lineage leading to the soil isolate *Ca.*  
242 *Nitrosarchaeum koreense* [62] could have evolved from an estuarine or shallow water ancestor  
243 suggesting a recolonization of land (Fig. 2a).

244

245 Regarding the origin of deep sediments-dwelling AOA, the *amoA-NP-theta* lineage branches within  
246 mostly marine NP clades (Fig. 2a), suggesting that this lineage might have evolved from a pelagic  
247 marine ancestor. However, there is no evolutionary link between any pelagic AOA and the NP-delta  
248 clade, as the latter have been mostly retrieved in estuarine and deep marine sediments [57]. The most  
249 parsimonious evolutionary scenario would be that this group underwent a direct transition from  
250 estuarine sediments to marine sediments during its diversification.

251

252 Similarly, the newly proposed clade NP-iota, the earliest branching *Nitrosopumilales* which has so far  
253 exclusively been detected in marine sediments [28] does not seem to be closely related to pelagic

254 Nitrosopumilales but emerges instead among terrestrial clades (*Ca. Nitrosotaleales* and NP-Eta).  
255 Although, it is possible, that pelagic AOA closely related to *amoA*-NP-iota may be detected in further  
256 environmental surveys or that respective pelagic lineages got extinct, the *amoA*-NP-iota clade might as  
257 well have developed from terrestrial-estuarine organisms, as discussed for *amoA*-NP-delta above.

258

### 259 **Comparative genomics of deep-sea sediment AOA**

260

261 We constructed a total of 33,442 protein families from our taxon-enriched genome dataset representing  
262 a wide variety of ecological environments (see Materials and Methods and Table S1). From these,  
263 12,137 have representatives from at least two different genomes. In our analysis, the AOA core  
264 proteome comprises 760 protein families present in at least one genome of each of the four major AOA  
265 lineages: *Ca. Nitrosocaldales*, *Nitrososphaerales*, *Ca. Nitrosotaleales* and *Ca. Nitrosopumilales* (Fig. 3,  
266 Table S3). Thus, our results are similar to previous estimations of the AOA core genome (743 gene  
267 families) [63], and slightly lower than our own earlier estimate of 860 gene families (based on only 7  
268 genomes [64]). Only 269 of the core AOA families seem to be AOA-specific (Fig. 3, Table S3). Only  
269 123 out of these 269 families were found to be present in >50 % of the genomes in each of the four  
270 AOA orders (a relatively low threshold to account for the incompleteness of MAGs), suggesting a  
271 relatively low degree of conservation within these lineages. These results imply great intra-order  
272 genomic variability and important differential gene loss among subclades and across genomes during  
273 the evolution and diversification of AOA. For instance, despite the fact that Nitrosopumilales have 3091  
274 specific families with proteins encoded in at least two genomes and present in one or more NP-  
275 subclades, a subset of solely 24 families were conserved in all 7 NP-subclades (Fig. 3). Considering the  
276 very relaxed criteria used, this is an astonishingly small number of conserved families in all 7 NP-  
277 subclades.

278

279 To identify possible specific adaptations of AOA to deep marine sediments, we searched for families  
280 present in at least two of the three marine sediments clades represented by our 11 MAGs (i.e. *amoA*-  
281 NP-theta, -delta and -iota), to the exclusion of all the other genomes analyzed in this study (Fig S2,  
282 Table S1). 72 families were identified (Fig. 3), of which only 25 % (18 families) could be functionally  
283 annotated (Table S3) and were classified into the following categories: information processing systems  
284 (7), metabolism (5) and cellular processes (6). Some of these 18 families had functional equivalents in  
285 most if not all AOA (e.g. RadA homologs). We additionally found 41 families shared predominantly  
286 between NP sub-clades with deep ocean (>1000m) representatives (i.e. *amoA*-NP-alpha, NP-gamma  
287 sublineages recovered from the Mariana, Izu-Ogasawara Trenches and the Red Sea [23, 58], NP-theta,  
288 NP-iota and NP-delta), to the exclusion of all other NP sub-clades. From these 41 families, 18 have  
289 functional annotation: information processing systems (8), metabolism (4) and cellular processes (6).



290 Families with functional significance specific to marine sediments, such as a putative lactate racemase,  
291 or those shared with deep ocean MAGs, are discussed below. Families identified in deep ocean MAGs  
292 but not found in the sediment clades are still depicted in Fig. S4 for comparative purposes. Additionally,  
293 we investigated the number of clusters shared between deep sediments-derived MAGs and the terrestrial  
294 (present in soils and sediments) lineage *Nitrososphaerales*, to the exclusion of all other AOA lineages  
295 and NP-subclades. Interestingly they share only one protein family related to coenzyme F<sub>420</sub>-dependent  
296 luciferase-like oxidoreductases.

297

### 298 **Metabolic reconstruction of the *amoA*-NP-theta, *amoA*-NP-delta, *amoA*-NP-iota clades**

299

300 The full annotations for all genes and pathways discussed in the following section can be found in Table  
301 S4.

302

### 303 **Central energy and carbon metabolism**

304

305 All three sediment clades (i.e. *amoA*-NP-delta, *amoA*-NP-theta, *amoA*-NP-iota) encode complete sets  
306 of genes involved in ammonia oxidation, namely *amoA*XCB in the typical organization observed in  
307 other *Nitrosopumilales* (Fig. 5, Table S3) [21, 65, 66]. Missing subunits in certain MAGs seem to be  
308 due to genome incompleteness. A nitrite reductase (NirK) homolog is present, as well as multiple blue  
309 copper domain proteins putatively functioning as electron carriers. All clades encode a single high-  
310 affinity ammonia transporter family protein (Amt), as opposed to two Amt transporters of differing  
311 affinities found in other AOA. This could represent an adaptation to an oligotrophic environment [67].  
312 Four out of six NP-theta MAGs and all *amoA*-NP-delta MAGs encode complete or near-complete  
313 urease operons (Fig. 4, Table S3). Together with a putative nitrilase (Nit1, conserved in AOA) and a  
314 putative omega-amidase (Nit2, present in *amoA*-NP-theta, -delta, -eta, -gamma), these genes indicate  
315 expanded substrate utilization capabilities for ammonia (and CO<sub>2</sub>) generation by cleaving urea, nitriles  
316 and dicarboxylic acid monoamides. Utilization of organic nitrogen compounds is a feature shared with  
317 other NP-clades that include deep-sea lineages and previously described for subseafloor AOA (Fig. 4,  
318 5, S4) [10, 23, 24, 33].

319

320 All three sediment clades encode full gene sets for electron transfer to O<sub>2</sub> via NADH dehydrogenase  
321 (complex I), type *bc*<sub>1</sub> complex III, and a heme-copper terminal oxidase (complex IV) (Fig. 5, Table S3).  
322 No alternative complexes using a different electron acceptor were identified.

323

324 All three sediment clades encode the full repertoire conserved among AOA for autotrophic carbon  
325 fixation via the 3-hydroxypropionate/4-hydroxybutyrate (3HP/4HB) cycle and carbon metabolism  
326 through oxidative TCA and gluconeogenesis up to the formation of glucose-6P via a phosphoglucose

327 isomerase (not present in NS) homolog in NP-theta, NP-delta (Fig. 5, Table S3) [31, 65, 68]. A malic  
328 enzyme, enabling the formation of pyruvate from malate with the concomitant generation of NAD(P)H  
329 expands metabolic capacities in NP-theta and NP-iota (also in some other AOA, Fig. 5). As most AOA,  
330 all sediment clades have the capacity to synthesize polyhydroxybutyrate (PHB) storage compounds, an  
331 obvious advantage in an oligotrophic environment [69].

332

333 Complete or near-complete amino acid biosynthesis pathways as well as vitamins (including vitamin  
334 B12) are present in all three sediment clades, as in other AOA (Table S3). As observed in NP-alpha  
335 representatives [23], the sediment clades use the B12-independent pathway for methionine biosynthesis  
336 (*metE*) (Fig. 4). Albeit this being a less catalytically efficient enzyme than the B12-dependent *metH*  
337 present in all other AOA, it is nevertheless much less costly energetically [70], and would therefore be  
338 an advantage in an energy-limiting environment where maintenance rather than fast growth is the norm  
339 [71].

340

#### 341 **Utilization of exogenous organic compounds**

342

343 All three sediment lineages seem to be capable of utilizing exogenous organic compounds from  
344 fermentation processes such as formate, lactate and 3-aminobutyryl-CoA as a source of carbon, nitrogen  
345 and reductive potential. This finding expands the range of organic carbon and nitrogen substrates  
346 suggested earlier for deep ocean AOA (previously comprising amino-acids, peptides and compatible  
347 solutes) and reinforces their role as key players in nutrient cycling in these biomes [6, 10, 23, 24, 27,  
348 33].

349

350 A putative soluble NAD<sup>+</sup>-dependent formate dehydrogenase (Fdh), distinct from the iron-  
351 sulfur/molybdenum containing Fdh enzymes traditionally found as part of formate-hydrogen lyase  
352 systems [72], is found in the NP-theta and NP-iota clades (as well as in certain NS representatives and  
353 NP-alpha Fig. 4, 5). However, no additional hydrogenases or known formate transport systems were  
354 identified in the marine sediment bins. Our phylogenetic analysis (Fig. S3) indicates that the enzyme is  
355 a bona fide NAD<sup>+</sup>-dependent Fdh within the superfamily of D-2-hydroxyacid dehydrogenases [73].  
356 This indicates the capacity to use formate for supplementing CO<sub>2</sub> needs while concomitantly supplying  
357 reducing equivalents (as in methylotrophs [74, 75]).

358

359 A putative 3-aminobutyryl-CoA aminotransferase (Kat, EC 2.6.1.111) and a 3-aminobutyryl-CoA  
360 ammonia lyase (Kal, EC 4.3.1.14) were identified in the NP-theta and NP-delta bins, and are also found  
361 in some NP-alpha, NP-gamma and NT lineages (Fig. 4, 5). These enzymes participate in lysine  
362 fermentation pathway variants in fermentative bacteria [76]. Although the key pathway enzymes are  
363 not present in the sediment bins or any other AOA, this intermediate compound (3-aminobutyryl-CoA)

364 could be scavenged from fermenting microorganisms in the sediment community. Both enzymes can  
365 remove ammonia from 3-aminobutyryl-CoA either by transferring it to  $\alpha$ -ketoglutarate resulting in the  
366 formation of acetoacetyl-CoA and glutamate (Kat), or by an elimination reaction that produces crotonyl-  
367 CoA and free ammonia (Kal). Both products are intermediates of the 3HB/4HP (CO<sub>2</sub> fixation-) pathway  
368 and could be processed accordingly, generating reducing potential in the subsequent steps.

369

370 The presence of a putative lactate racemase family protein (LarA), specific to the NP-theta, delta and  
371 iota clades (Fig. 4, 5) suggests that lactate is another fermentation product that could be utilized by these  
372 lineages. This is one of the very few protein families with a putative function prediction shared  
373 specifically between the sediment AOA clades to the exclusion of all other AOA, suggesting an  
374 essential role. LarA in lactobacilli catalyzes the interconversion of D- and L-lactate, ensuring an  
375 adequate supply of D-lactate which is an important cell wall component conferring resistance to  
376 vancomycin [77] (see Supplementary Information). Given the importance of cell envelope maintenance  
377 in the adverse conditions of the sediments, it is possible that D-lactate has a similar use in sediment  
378 AOA, conferring resistance to exogenous toxic compounds. Alternatively, the lactate dehydrogenase-  
379 like malate dehydrogenase homologs found in AOA possess features indicating that they could have a  
380 broad substrate specificity, being able to utilize pyruvate in addition to oxaloacetate, and producing the  
381 L-stereoisomers of the products (see Supplementary Information and Fig. S5), with the concomitant  
382 reduction of NAD<sup>+</sup> [78].

383

384 As mentioned above, the only protein family specifically shared among the sediment MAGs and the  
385 terrestrial NS lineages, is an F<sub>420</sub>-dependent luciferase-like oxidoreductase. While the metabolic role of  
386 these proteins in AOA in general is still unclear, the ability to degrade recalcitrant carbon via  
387 oxygenases in a manner similar to terrestrial organisms has been observed in sediment communities  
388 [60, 69], and is proposed to provide an opportunistic advantage for expanded substrate utilization in  
389 limiting conditions.

390

### 391 **Adaptations to low energy and high pressure environments**

392

393 Deep-sea sedimentary environments found under the oligotrophic ocean present manifold challenges to  
394 microbial life, namely energy limitation, high hydrostatic pressure (HHP), low temperatures (< 4°C)  
395 and potential microoxic or anoxic conditions detrimental to aerobic metabolisms [18, 19, 71, 81–84].  
396 Microorganisms respond with global metabolic changes rather than stress responses [85], some of  
397 which are found in the deep sediment AOA clades.

398

399 Many organisms possessing distinct electron transport, ion gradient generating and ATP synthase  
400 complexes that are differentially regulated under HHP [71, 86–88]. Interestingly, both NP-iota MAGs  
401 and two out of six NP-theta MAGs encode complete gene clusters for both the A-type ATPase found  
402 in neutrophilic AOA and V-type ATPase variant found in acidophilic/acidotolerant/piezotolerant  
403 archaea (and AOA) which is homologous to the proton/ion pumping ATPases from eukaryotes and  
404 enterococci (Fig. 4, 5) [89, 90]. The remaining NP-theta MAGs encode either the A-type or the V-type  
405 ATPase (although this could be attributed to the incompleteness of the MAGs). The V-type ATPase has  
406 been suggested to confer physiological advantages in high pressure environments by virtue of its proton-  
407 pumping function [89]. This would enable the maintenance of intracellular pH, which is disrupted by  
408 the accelerated release of protons from weak acids (such as carbonic acid) under HHP [91]. The  
409 presence of both ATPase variants is also observed in abysso/hadopelagic NP-gamma AOA lineages,  
410 while the deep marine NP-alpha encode only the V-type ATPase (Fig. 4,5 and Supplementary  
411 Information for further discussion) [89]. In contrast, all three NP-delta MAGs encode only the canonical  
412 A-type ATPase (Fig. 5), but intriguingly at least two of them seem to contain a partially duplicated  
413 NADH dehydrogenase (complex I) operon which could similarly be responsible to alleviate cytoplasm  
414 acidification (see Supplementary Information).

415  
416 The cytoplasmic membrane is severely affected by HHP, which induces a tighter packing of the lipids  
417 and a transition to a gel state, resulting in a decrease in fluidity and permeability [92, 93]. The presence  
418 of a N-acetylneuraminic acid mutarotase (NanM) in NP-theta, NP-iota, NP-delta MAGs (Fig. 4, shared  
419 with a few abyssopelagic/hadal NP-gamma species) indicates the ability to acquire sialic acid [94]. This  
420 important component of glycoconjugates found on cell walls has multiple functions including  
421 concentrating water on cell surfaces [95] and regulating membrane permeability [96]. It can also enable  
422 the regulation of the thickness of the hydration layer surrounding the cell membrane [97], which could  
423 prevent system volume change and stabilize membrane protein complexes and membrane structure  
424 under pressure [97, 98], while also regulating membrane permeability [96]. Modification of the  
425 hydration layer properties has also been identified as a specific adaptation mechanism of the piezophilic  
426 archaeon *Thermococcus barophilus* [99].

427  
428 An ABC-type branched-chain amino acid transport system of the HAAT family (3.A.1.4) is present in  
429 all three sediment clades as well as in one NP-alpha MAG, sponge-associated and few other lineages  
430 of the NP-gamma clade, NS and non-AOA Thaumarchaea (Fig. 4, 5, Table S3). The uptake of amino  
431 acids has been interpreted earlier as indicative of the possibility of organic carbon utilization via  
432 enzymes participating in canonical amino acid biosynthesis pathways and present in all or most AOA  
433 (e.g. aspA, ilvA, ilvE, aspC glyA, GDH, ProDH) [10, 23, 37, 61]. Such mixotrophic strategies are also  
434 responsible for the enormous ecological success in oligotrophic environments of oceanic cyanobacterial  
435 lineages [100]. However, canonical amino acid degradation key enzymes such as amino acid

436 hydroxylases, the branched-chain  $\alpha$ -keto acid dehydrogenase complex or 2-ketoacid:ferredoxin  
437 oxidoreductases have not been detected in deep sea or sediment AOA clades, nor are their genomes  
438 particularly enriched in proteases (Fig. S4). On the other hand, a metabolic shift from expensive *de*  
439 *novo* biosynthesis of cellular materials (with proteins accounting for 56% of total energy investment in  
440 oxic environments) to recycling of exogenous or endogenous resources is observed in HHP-adapted  
441 microorganisms. [16, 18, 69, 85, 86, 101, 102]. Therefore, it seems more likely that amino acids are  
442 used for recycling, as suggested earlier for AOA by isotope tracer and NanoSIMS experiments with  
443 sediment and oceanic crust communities [16, 32, 33, 69], and as observed in the obligate piezophile *T.*  
444 *barophilus* and other facultative piezophiles [102–104]. Moreover, amino acids (mostly glutamate,  
445 proline and glutamine) can be accumulated as compatible solutes to ensure the stabilization of  
446 macromolecular structures upon pressure or temperature related stress [104, 105]. It cannot be ruled out  
447 though that amino acids are also used for replenishing the intracellular ammonia pool, with minimal  
448 production (if at all) of reducing equivalents (Fig. 5) (see Supplementary Information for detailed  
449 discussion).

450

451 The sediment clades and especially NP-theta encode an extended repertoire of enzymes for DNA and  
452 protein repair compared to other NP (details in Supplementary Information and Fig. 4, 5, S4). This is  
453 an indication of energy investment towards maintenance of cellular components, rectifying damage due  
454 to low turnover rates and cellular aging rather than active and fast growth [71, 82, 106]. This strategy  
455 together with dormancy is presumed to be responsible for persistence in subseafloor energy limited  
456 environments [107].

457

## 458 **Osmoregulation**

459

460 All sediment clades do encode a putative bifunctional CTP:inositol-1-phosphate cytidyltransferase/di-  
461 myo-inositol-1,3'-phosphate-1'-phosphate synthase (ipct/dipps), responsible for the synthesis of the  
462 compatible solute di-myo-inositol-1,3'-phosphate (DIP) [108]. The enzyme is also found in deep marine  
463 AOA clades [23] (Fig. 4, 5). Biosynthetic genes for this compatible solute have so far only been  
464 observed in organisms growing above 55°C, and have been extensively transferred between archaea  
465 and bacteria [109], making these AOA clades the first non-thermophilic organisms with the ability to  
466 synthesize this inositol derivative. Compatible solutes can confer resistance to various types of stress,  
467 so it is possible that this anionic solute has multiple roles in these polyextremophilic organisms [110]  
468 especially since no pathways for synthesis/uptake of known osmolytes such as mannosylglycerate,  
469 ectoine/hydroxyectoine or glycine/betaine were identified in the NP-theta, NP-iota, NP-delta MAGs  
470 (Fig. 4, 5, S3).

471

472

## 473 **Conclusions**

474

475 Our comparative and phylogenomic analyses using 11 sediment-derived MAGs reported in this study,  
476 together with a large collection of AOA genomes with a broad phylogenetic and ecological distribution  
477 allowed us to study the evolution, diversification and adaptation mechanisms of AOA into deep marine  
478 environments. Based on phylogenomic analyses and different from earlier scenarios [111] we conclude  
479 that AOA from deep marine sediments evolved independently within (at least) three lineages. Although  
480 it seems that the ancestor of the *amoA*-NP-theta clade was pelagic and descendants of it occupied the  
481 deep marine sediments and the oxic seafloor crust, it is likely that in the case of *amoA*-NP-iota and  
482 *amoA*-NP-delta, there was a transition from terrestrial ecosystems/freshwater sediment to marine  
483 sediments without having colonized the ocean water column first. Interestingly, all extended capacities  
484 and adaptations discussed in this manuscript are found to be combined in lineage *amoA*-NP-theta,  
485 which represents the most widely distributed and abundant clade ranging over different marine sediment  
486 layers, whereas the other two clades that share some of these features exhibit a more distinct distribution  
487 pattern.

488

489 All AOA adapted to marine sediments and investigated in this study are able to perform ammonia  
490 oxidation in combination with CO<sub>2</sub> fixation like all other described AOA. In addition, all three lineages  
491 seem to be capable of utilising exogenous organic fermentation products that they convert into  
492 intermediates of their central carbon metabolism, a feature they share with pelagic AOA from the deep  
493 ocean and a few other AOA. This, together with the capability of taking up aminoacids, putatively for  
494 recycling into proteins or utilization of amine groups, would support growth in this extremely  
495 oligotrophic environment and contribute to organic nitrogen and carbon turnover in the sediments. In  
496 the absence of any components indicating increased capacity of amino acid degradation in these AOA  
497 we argue that recycling of amino acids rather than catabolism as otherwise suggested in [10, 23, 113]  
498 represents an advantageous and more plausible strategy for the sedimentary AOA clades. It is also a  
499 trait frequently observed in other sedimentary and crustal population groups to overcome the prohibitive  
500 energetic costs of *de novo* monomer biosynthesis [69]. Additionally, a broad repertoire of DNA and  
501 protein repair enzymes, seem to enable the deep sediment-adapted AOA to counteract the most severe  
502 consequences of cellular aging. An important feature shared with HHP-adapted deep marine clades is  
503 the presence of two ATPase complexes in *amoA*-NP-theta and *amoA*-NP-iota, with putatively opposing  
504 functions that would alleviate the effects of pH imbalance due to HHP, as well as the PMF-destabilizing  
505 effects of age-induced membrane leakage. These features shed light onto the mechanisms underlying  
506 AOA persistence in the benthic environments beneath the open ocean, from the surface sediments down  
507 to the underlying oceanic crust, and further consolidate the central role of these archaea in the global  
508 biogeochemical cycles.

509

510 **Author Contributions**

511

512 CS, SLJ & TN conceived the study. RZ & SLJ sampled and processed the Atlantic sediments, while  
513 TN, HN, MH & YT sampled and processed the Pacific sediments. RZ, SSA & RP assembled the MAGs.  
514 RP performed the phylogenetic and comparative genomic analyses. MK annotated and analyzed the  
515 genomes. MK, RP, RZ, SSA, SLJ, CS & TN interpreted data. MK, RP & CS wrote the manuscript with  
516 contributions from TN, RZ, SLJ & SSA.

517

518 **Acknowledgements**

519

520 We thank Philipp Weber for help with visualizations. The LABGeM (CEA/Genoscope & CNRS  
521 UMR8030), the France Génomique and French Bioinformatics Institute national infrastructures (funded  
522 as part of Investissement d'Avenir program managed by Agence Nationale pour la Recherche, contracts  
523 ANR-10-INBS-09 and ANR-11-INBS-0013) are acknowledged for support within the MicroScope  
524 annotation platform. We thank onboard scientists, officers and crews of RV *Yokosuka* and the manned  
525 submersible *Shinkai 6500* for their help and operation during the YK13-09 and YK13-12 cruises. We  
526 wish to acknowledge the entire scientific party and all crewmembers onboard *Joides Resolution* during  
527 IODP expedition 336, for their help and expertise. Especially, Co-chief scientists Katrina Edwards and  
528 Wolfgang Bach. We also wish to thank chief scientist of the CGB summer cruise 2014 Rolf Berger  
529 Pedersen for the sediment coring opportunity and thank Ingeborg Ørklund, Desiree Roerdink, Tamara  
530 Bumberger and Ingunn H Thorseth for their help with porewater extraction and nutrient analysis. This  
531 project was funded by FWF grant 27017 and ERC AdvGr TACKLE (695192). SLJ was funded by The  
532 Trond Mohn starting grant BFS2017REK03 and the Census of Deep Life phase V grant. TN was  
533 partially supported by JSPS KAKENHI Grant Number JP19H05684 within JP19H05679 (Post-Koch  
534 Ecology).

535

536

537 **Competing Interests**

538

539 The authors declare no competing financial interests.

540

541

542

543

544

545

546

547 **References**

548

- 549 1. Schleper C, Nicol GW. Ammonia-oxidising archaea--physiology, ecology and evolution. *Adv*  
550 *Microb Physiol* 2010; **57**: 1–41.
- 551 2. Stahl DA, de la Torre JR. Physiology and diversity of ammonia-oxidizing archaea. *Annu Rev*  
552 *Microbiol* 2012; **66**: 83–101.
- 553 3. Hatzenpichler R. Diversity, physiology, and niche differentiation of ammonia-oxidizing  
554 archaea. *Appl Env Microbiol* 2012; **78**: 7501–7510.
- 555 4. Pester M, Schleper C, Wagner M. The Thaumarchaeota: an emerging view of their phylogeny  
556 and ecophysiology. *Curr Opin Microbiol* 2011.
- 557 5. Lehtovirta-Morley LE. Ammonia oxidation: Ecology, physiology, biochemistry and why they  
558 must all come together. *FEMS Microbiol Lett* 2018; **365**.
- 559 6. Santoro AE, Richter RA, Dupont CL. Planktonic Marine Archaea. *Ann Rev Mar Sci* 2019; **11**:  
560 annurev-marine-121916-063141.
- 561 7. Francis CA, Roberts KJ, Beman JM, Santoro AE, Oakley BB. Ubiquity and diversity of  
562 ammonia-oxidizing archaea in water columns and sediments of the ocean. *Proc Natl Acad Sci*  
563 *U S A* 2005; **102**: 14683–8.
- 564 8. Durbin AM, Teske A. Archaea in Organic-Lean and Organic-Rich Marine Subsurface  
565 Sediments: An Environmental Gradient Reflected in Distinct Phylogenetic Lineages. *Front*  
566 *Microbiol* 2012; **3**.
- 567 9. Park SJ, Park BJ, Rhee SK. Comparative analysis of archaeal 16S rRNA and amoA genes to  
568 estimate the abundance and diversity of ammonia-oxidizing archaea in marine sediments.  
569 *Extremophiles* 2008; **12**: 605–615.
- 570 10. Vuillemin A, Wankel SD, Coskun ÖK, Magritsch T, Vargas S, Estes ER, et al. Archaea  
571 dominate oxic seafloor communities over multimillion-year time scales. *Sci Adv* 2019; **5**:  
572 eaaw4108.
- 573 11. Nunoura T, Nishizawa M, Hirai M, Shimamura S, Harnvoravongchai P, Koide O, et al.  
574 Microbial Diversity in Sediments from the Bottom of the Challenger Deep, the Mariana  
575 Trench. *Microbes Environ* 2018; **33**: 186–194.
- 576 12. Zhao R, Hannisdal B, Mogollon JM, Jørgensen SL. Nitrifier abundance and diversity peak at  
577 deep redox transition zones. *Sci Rep* 2019; **9**: 1–12.
- 578 13. Jørgensen SL, Zhao R. Microbial Inventory of Deeply Buried Oceanic Crust from a Young  
579 Ridge Flank. *Front Microbiol* 2016; **7**.
- 580 14. Zhao R, Dahle H, Ramírez GA, Jørgensen SL. Indigenous Ammonia-Oxidizing Archaea in  
581 Oxic Subseafloor Oceanic Crust. *mSystems* 2020; **5**.
- 582 15. Nunoura T, Nishizawa M, Kikuchi T, Tsubouchi T, Hirai M, Koide O, et al. Molecular  
583 biological and isotopic biogeochemical prognoses of the nitrification-driven dynamic



- 584 microbial nitrogen cycle in hadopelagic sediments. *Environ Microbiol* 2013; **15**: 3087–3107.
- 585 16. Morono Y, Terada T, Nishizawa M, Ito M, Hillion F, Takahata N, et al. Carbon and nitrogen  
586 assimilation in deep seafloor microbial cells. *Proc Natl Acad Sci U S A* 2011; **108**: 18295–  
587 300.
- 588 17. Wheat CG, Fisher AT, McManus J, Hulme SM, Orcutt BN. Cool seafloor hydrothermal  
589 springs reveal global geochemical fluxes. *Earth Planet Sci Lett* 2017; **476**: 179–188.
- 590 18. Orsi WD. Ecology and evolution of seafloor and subseafloor microbial communities. *Nat Rev*  
591 *Microbiol* 2018; **16**: 671–683.
- 592 19. D’Hondt S, Pockalny R, Fulfer VM, Spivack AJ. Subseafloor life and its biogeochemical  
593 impacts. *Nat Commun* 2019; **10**: 3519.
- 594 20. Qin W, Martens-Habbena W, Kobelt JN, Stahl DA. Candidatus Nitrosopumilales . *Bergey’s*  
595 *Manual of Systematics of Archaea and Bacteria*. 2016.
- 596 21. Santoro AE, Dupont CL, Richter RA, Craig MT, Carini P, McIlvin MR, et al. Genomic and  
597 proteomic characterization of ‘Candidatus Nitrosopelagicus brevis’: An ammonia-oxidizing  
598 archaeon from the open ocean. *Proc Natl Acad Sci U S A* 2015; **112**: 1173–8.
- 599 22. Nunoura T, Takaki Y, Hirai M, Shimamura S, Makabe A, Koide O, et al. Hadal biosphere:  
600 Insight into the microbial ecosystem in the deepest ocean on Earth. *Proc Natl Acad Sci U S A*  
601 2015; **112**: E1230–E1236.
- 602 23. Wang Y, Huang J-M, Cui G-J, Nunoura T, Takaki Y, Li W-L, et al. Genomics insights into  
603 ecotype formation of ammonia-oxidizing archaea in the deep ocean. *Environ Microbiol* 2019;  
604 **21**: 716–729.
- 605 24. León-zayas R, Novotny M, Podell S, Shepard CM, Berkenpas E, Nikolenko S, et al. Single  
606 Cells within the Puerto Rico Trench Suggest Hadal Adaptation of Microbial Lineages. *AEM*  
607 2015; **81**: 8265–8276.
- 608 25. Sintes E, Bergauer K, De Corte D, Yokokawa T, Herndl GJ. Archaeal amoA gene diversity  
609 points to distinct biogeography of ammonia-oxidizing Crenarchaeota in the ocean. *Environ*  
610 *Microbiol* 2013; **15**: 1647–58.
- 611 26. Nunoura T, Hirai M, Yoshida-Takashima Y, Nishizawa M, Kawagucci S, Yokokawa T, et al.  
612 Distribution and Niche Separation of Planktonic Microbial Communities in the Water  
613 Columns from the Surface to the Hadal Waters of the Japan Trench under the Eutrophic  
614 Ocean. *Front Microbiol* 2016; **7**.
- 615 27. Santoro AE, Saito MA, Goepfert TJ, Lamborg CH, Dupont CL, DiTullio GR. Thaumarchaeal  
616 ecotype distributions across the equatorial Pacific Ocean and their potential roles in  
617 nitrification and sinking flux attenuation. *Limnol Oceanogr* 2017; **62**: 1984–2003.
- 618 28. Alves RJE, Minh BQ, Urich T, von Haeseler A, Schleper C. Unifying the global phylogeny  
619 and environmental distribution of ammonia-oxidising archaea based on amoA genes. *Nat*  
620 *Commun* 2018; **9**: 1517.

- 621 29. Ren M, Feng X, Huang Y, Wang H, Hu Z, Clingenpeel S, et al. Phylogenomics suggests  
622 oxygen availability as a driving force in Thaumarchaeota evolution. *ISME J* 2019; 1.
- 623 30. Stolper DA, Bucholz CE. Neoproterozoic to early Phanerozoic rise in island arc redox state  
624 due to deep ocean oxygenation and increased marine sulfate levels. *Proc Natl Acad Sci* 2019;  
625 **116**: 8746–8755.
- 626 31. Konneke M, Schubert DM, Brown PC, Hugler M, Standfest S, Schwander T, et al. Ammonia-  
627 oxidizing archaea use the most energy-efficient aerobic pathway for CO<sub>2</sub> fixation. *Proc Natl*  
628 *Acad Sci U S A* 2014; **111**: 8239–8244.
- 629 32. Molari M, Manini E, Dell’Anno A. Dark inorganic carbon fixation sustains the functioning of  
630 benthic deep-sea ecosystems. *Global Biogeochem Cycles* 2013; **27**: 212–221.
- 631 33. Dekas AE, Parada AE, Mayali X, Fuhrman JA, Wollard J, Weber PK, et al. Characterizing  
632 Chemoautotrophy and Heterotrophy in Marine Archaea and Bacteria With Single-Cell Multi-  
633 isotope NanoSIP. *Front Microbiol* 2019; **10**: 2682.
- 634 34. Kits KD, Sedlacek CJ, Lebedeva E V., Han P, Bulaev A, Pjevac P, et al. Kinetic analysis of a  
635 complete nitrifier reveals an oligotrophic lifestyle. *Nature* 2017; **549**: pages 269–272.
- 636 35. Eloe EA, Fadrosch DW, Novotny M, Zeigler Allen L, Kim M, Lombardo M-J, et al. Going  
637 Deeper: Metagenome of a Hadopelagic Microbial Community. *PLoS One* 2011; **6**: e20388.
- 638 36. Lloyd KG, Schreiber L, Petersen DG, Kjeldsen KU, Lever M a, Steen AD, et al. Predominant  
639 archaea in marine sediments degrade detrital proteins. *Nature* 2013; **496**: 215–8.
- 640 37. Li M, Baker BJ, Anantharaman K, Jain S, Breier JA, Dick GJ. Genomic and transcriptomic  
641 evidence for scavenging of diverse organic compounds by widespread deep-sea archaea. *Nat*  
642 *Commun* 2015; **6**: 8933.
- 643 38. Zhao R, Mogollón JM, Abby SS, Schleper C, Biddle JF, Roerdink D, et al. In situ growth of  
644 anammox bacteria in subseafloor sediments. *bioRxiv* 2019; 729350.
- 645 39. Bolger AM, Lohse M, Usadel B. Trimmomatic: a flexible trimmer for Illumina sequence data.  
646 *Bioinformatics* 2014; **30**: 2114–2120.
- 647 40. Li D, Liu C-M, Luo R, Sadakane K, Lam T-W. MEGAHIT: an ultra-fast single-node solution  
648 for large and complex metagenomics assembly via succinct de Bruijn graph. *Bioinformatics*  
649 2015; **31**: 1674–1676.
- 650 41. Alneberg J, Bjarnason BS, de Bruijn I, Schirmer M, Quick J, Ijaz UZ, et al. Binning  
651 metagenomic contigs by coverage and composition. *Nat Methods* 2014; **11**: 1144–1146.
- 652 42. Kang DD, Froula J, Egan R, Wang Z. MetaBAT, an efficient tool for accurately reconstructing  
653 single genomes from complex microbial communities. *PeerJ* 2015; **3**: e1165.
- 654 43. Wu Y-W, Simmons BA, Singer SW. MaxBin 2.0: an automated binning algorithm to recover  
655 genomes from multiple metagenomic datasets. *Bioinformatics* 2016; **32**: 605–607.
- 656 44. Parks DH, Imelfort M, Skennerton CT, Hugenholtz P, Tyson GW. CheckM: assessing the  
657 quality of microbial genomes recovered from isolates, single cells, and metagenomes. *Genome*

- 658 *Res* 2015; **25**: 1043–1055.
- 659 45. Vallenet D, Calteau A, Cruveiller S, Gachet M, Lajus A, Josso A, et al. MicroScope in 2017:  
660 an expanding and evolving integrated resource for community expertise of microbial genomes.  
661 *Nucleic Acids Res* 2017; **45**: D517–D528.
- 662 46. Makarova KS, Galperin MY, Koonin E V. Comparative genomic analysis of evolutionarily  
663 conserved but functionally uncharacterized membrane proteins in archaea: Prediction of novel  
664 components of secretion, membrane remodeling and glycosylation systems. *Biochimie* 2015;  
665 1–11.
- 666 47. Kristensen DM, Kannan L, Coleman MK, Wolf YI, Sorokin A, Koonin E V., et al. A low-  
667 polynomial algorithm for assembling clusters of orthologous groups from intergenomic  
668 symmetric best matches. *Bioinformatics* 2010; **26**: 1481–1487.
- 669 48. Fu L, Niu B, Zhu Z, Wu S, Li W. CD-HIT: accelerated for clustering the next-generation  
670 sequencing data. *Bioinformatics* 2012; **28**: 3150–3152.
- 671 49. Graham ED, Heidelberg JF, Tully BJ. Potential for primary productivity in a globally-  
672 distributed bacterial phototroph. *ISME J* 2018; **12**: 1861–1866.
- 673 50. Rinke C, Schwientek P, Sczyrba A, Ivanova NN, Anderson IJ, Cheng JF, et al. Insights into  
674 the phylogeny and coding potential of microbial dark matter. *Nature* 2013; **499**: 431–437.
- 675 51. Katoh K, Standley DM. MAFFT multiple sequence alignment software version 7:  
676 improvements in performance and usability. *Mol Biol Evol* 2013; **30**: 772–780.
- 677 52. Criscuolo A, Gribaldo S. BMGE (Block Mapping and Gathering with Entropy): a new  
678 software for selection of phylogenetic informative regions from multiple sequence alignments.  
679 *BMC Evol Biol* 2010; **10**: 210.
- 680 53. Minh BQ, Schmidt HA, Chernomor O, Schrempf D, Woodhams MD, von Haeseler A, et al.  
681 IQ-TREE 2: New Models and Efficient Methods for Phylogenetic Inference in the Genomic  
682 Era. *Mol Biol Evol* 2020; **37**: 1530–1534.
- 683 54. Hiraoka S, Hirai M, Matsui Y, Makabe A, Minegishi H, Tsuda M, et al. Microbial community  
684 and geochemical analyses of trans-trench sediments for understanding the roles of hadal  
685 environments. *ISME J* 2020; **14**: 740–756.
- 686 55. Durbin AM, Teske A. Sediment-associated microdiversity within the Marine Group I  
687 Crenarchaeota. *Environ Microbiol Rep* 2010; **2**: 693–703.
- 688 56. Zhang S, Song W, Wemheuer B, Reveillaud J, Webster N, Thomas T. Comparative Genomics  
689 Reveals Ecological and Evolutionary Insights into Sponge-Associated Thaumarchaeota.  
690 *mSystems* 2019; **4**: e00288-19.
- 691 57. Hug LA, Thomas BC, Sharon I, Brown CT, Sharma R, Hettich RL, et al. Critical  
692 biogeochemical functions in the subsurface are associated with bacteria from new phyla and  
693 little studied lineages. *Environ Microbiol* 2016; **18**: 159–173.
- 694 58. Ngugi DK, Blom J, Alam I, Rashid M, Ba-Alawi W, Zhang G, et al. Comparative genomics

- 695 reveals adaptations of a halotolerant thaumarchaeon in the interfaces of brine pools in the Red  
696 Sea. *ISME J* 2015; **9**: 396–411.
- 697 59. Dombrowski N, Teske AP, Baker BJ. Expansive microbial metabolic versatility and  
698 biodiversity in dynamic Guaymas Basin hydrothermal sediments. *Nat Commun* 2018; **9**: 4999.
- 699 60. Tully BJ, Heidelberg JF. Potential Mechanisms for Microbial Energy Acquisition in Oxidic  
700 Deep Sea Sediments. *Appl Environ Microbiol* 2016; AEM.01023-16.
- 701 61. Moeller FU, Webster NS, Herbold CW, Behnam F, Domman D, Albertsen M, et al.  
702 Characterization of a thaumarchaeal symbiont that drives incomplete nitrification in the  
703 tropical sponge *Ianthella basta*. *Environ Microbiol* 2019; 1462-2920.14732.
- 704 62. Jung M-Y, Islam MA, Gwak J-H, Kim J-G, Rhee S-K. *Nitrosarchaeum koreense* gen. nov., sp.  
705 nov., an aerobic and mesophilic, ammonia-oxidizing archaeon member of the phylum  
706 Thaumarchaeota isolated from agricultural soil. *Int J Syst Evol Microbiol* 2018; **68**: 3084–  
707 3095.
- 708 63. Herbold CW, Lehtovirta-Morley LE, Jung M-Y, Jehmlich N, Hausmann B, Han P, et al.  
709 Ammonia-oxidising archaea living at low pH: Insights from comparative genomics. *Environ*  
710 *Microbiol* 2017; **19**: 4939–4952.
- 711 64. Kerou M, Offre P, Valledor L, Abby SS, Melcher M, Nagler M, et al. Proteomics and  
712 comparative genomics of *Nitrososphaera viennensis* reveal the core genome and adaptations of  
713 archaeal ammonia oxidizers. *Proc Natl Acad Sci U S A* 2016; **113**: E7937–E7946.
- 714 65. Walker CB, de la Torre JR, Klotz MG, Urakawa H, Pinel N, Arp DJ, et al. *Nitrosopumilus*  
715 *maritimus* genome reveals unique mechanisms for nitrification and autotrophy in globally  
716 distributed marine crenarchaea. *Proc Natl Acad Sci U S A* 2010; **107**: 8818–8823.
- 717 66. Bayer B, Vojvoda J, Offre P, Alves RJ, Elisabeth NH, Garcia JA, et al. Physiological and  
718 genomic characterization of two novel marine thaumarchaeal strains indicates niche  
719 differentiation. *ISME J* 2016; **10**: 1051–1063.
- 720 67. Offre P, Kerou M, Spang A, Schleper C. Variability of the transporter gene complement in  
721 ammonia-oxidizing archaea. *Trends Microbiol* 2014; **22**: 665–675.
- 722 68. Spang A, Poehlein A, Offre P, Zumbragel S, Haider S, Rychlik N, et al. The genome of the  
723 ammonia-oxidizing *Candidatus Nitrososphaera gargensis*: insights into metabolic versatility  
724 and environmental adaptations. *Env Microbiol* 2012; **14**: 3122–3145.
- 725 69. Li J, Mara P, Schubotz F, Sylvan JB, Burgaud G, Klein F, et al. Recycling and metabolic  
726 flexibility dictate life in the lower oceanic crust. *Nature* 2020; **579**: 250–255.
- 727 70. Pejchal R, Ludwig ML. Cobalamin-Independent Methionine Synthase (MetE): A Face-to-Face  
728 Double Barrel That Evolved by Gene Duplication. *PLoS Biol* 2004; **3**: e31.
- 729 71. Jørgensen BB, Marshall IPG. Slow Microbial Life in the Seabed. *Ann Rev Mar Sci* 2016; **8**:  
730 311–332.
- 731 72. Crable BR, Plugge CM, McNerney MJ, Stams AJM. Formate Formation and Formate

- 732 Conversion in Biological Fuels Production. *Enzyme Res* 2011; **2011**: 1–8.
- 733 73. Matelska D, Shabalin IG, Jabłońska J, Domagalski MJ, Kutner J, Ginalski K, et al.  
734 Classification, substrate specificity and structural features of D-2-hydroxyacid  
735 dehydrogenases: 2HADH knowledgebase. *BMC Evol Biol* 2018; **18**: 199.
- 736 74. Tishkov VI, Popov VO. Catalytic mechanism and application of formate dehydrogenase.  
737 *Biochem* 2004; **69**: 1252–1267.
- 738 75. Overkamp KM, Kötter P, van der Hoek R, Schoondermark-Stolk S, Luttk MAH, van Dijken  
739 JP, et al. Functional analysis of structural genes for NAD<sup>+</sup>-dependent formate dehydrogenase  
740 in *Saccharomyces cerevisiae*. *Yeast* 2002; **19**: 509–520.
- 741 76. Perret A, Lechaplais C, Tricot S, Perchat N, Vergne C, Pellé C, et al. A novel acyl-CoA beta-  
742 transaminase characterized from a metagenome. *PLoS One* 2011.
- 743 77. Desguin B, Soumillion P, Hausinger RP, Hols P. Unexpected complexity in the lactate  
744 racemization system of lactic acid bacteria. *FEMS Microbiol Rev* 2017; **41**: S71–S83.
- 745 78. Roche J, Girard E, Mas C, Madern D. The archaeal LDH-like malate dehydrogenase from  
746 *Ignicoccus islandicus* displays dual substrate recognition, hidden allostery and a non-canonical  
747 tetrameric oligomeric organization. *J Struct Biol* 2019; **208**: 7–17.
- 748 79. Greening C, Ahmed FH, Mohamed AE, Lee BM, Pandey G, Warden AC, et al. Physiology,  
749 Biochemistry, and Applications of F420 - and Fo<sup>-</sup>-Dependent Redox Reactions. *Microbiol Mol*  
750 *Biol Rev* 2016; **80**: 451–493.
- 751 80. Ney B, Ahmed FH, Carere CR, Biswas A, Warden AC, Morales SE, et al. The methanogenic  
752 redox cofactor F 420 is widely synthesized by aerobic soil bacteria. *ISME J* 2017; **11**: 125–  
753 137.
- 754 81. Jørgensen BB, Boetius A. Feast and famine - Microbial life in the deep-sea bed. *Nat Rev*  
755 *Microbiol* 2007; **5**: 770–781.
- 756 82. Hoehler TM, Jørgensen BB. Microbial life under extreme energy limitation. *Nat Rev*  
757 *Microbiol* 2013; **11**: 83–94.
- 758 83. Orcutt BN, Sylvan JB, Knab NJ, Edwards KJ. Microbial Ecology of the Dark Ocean above, at,  
759 and below the Seafloor. *Microbiol Mol Biol Rev* 2011; **75**: 361–422.
- 760 84. Morono Y, Terada T, Nishizawa M, Ito M, Hillion F, Takahata N, et al. Carbon and nitrogen  
761 assimilation in deep seafloor microbial cells. *Proc Natl Acad Sci U S A* 2011; **108**: 18295–  
762 18300.
- 763 85. Lever MA, Rogers KL, Lloyd KG, Overmann J, Schink B, Thauer RK, et al. Life under  
764 extreme energy limitation: a synthesis of laboratory- and field-based investigations. *FEMS*  
765 *Microbiol Rev* 2015; **39**: 688–728.
- 766 86. Vannier P, Michoud G, Oger P, Marteinsson VP, Jebbar M. Genome expression of  
767 *Thermococcus barophilus* and *Thermococcus kodakarensis* in response to different hydrostatic  
768 pressure conditions. *Res Microbiol* 2015; **166**: 717–725.

- 769 87. Ohke Y, Sakoda A, Kato C, Sambongi Y, Kawamoto J, Kurihara T, et al. Regulation of  
770 Cytochrome c - and Quinol Oxidases, and Piezotolerance of Their Activities in the Deep-Sea  
771 Piezophile *Shewanella violacea* DSS12 in Response to Growth Conditions. *Biosci Biotechnol*  
772 *Biochem* 2013; **77**: 1522–1528.
- 773 88. Campanaro S, De Pascale F, Telatin A, Schiavon R, Bartlett DH, Valle G. The transcriptional  
774 landscape of the deep-sea bacterium *Photobacterium profundum* in both a *toxR* mutant and its  
775 parental strain. *BMC Genomics* 2012; **13**: 567.
- 776 89. Wang B, Qin W, Ren Y, Zhou X, Jung M-Y, Han P, et al. Expansion of Thaumarchaeota  
777 habitat range is correlated with horizontal transfer of ATPase operons. *ISME J* 2019; 1–13.
- 778 90. Grüber G, Manimekalai MSS, Mayer F, Müller V. ATP synthases from archaea: The beauty of  
779 a molecular motor. *Biochim Biophys Acta - Bioenerg* 2014; **1837**: 940–952.
- 780 91. Abe F, Horikoshi K. Analysis of intracellular pH in the yeast *Saccharomyces cerevisiae* under  
781 elevated hydrostatic pressure: A study in baro- (piezo-) physiology. *Extremophiles* . 1998.
- 782 92. Bartlett DH. Pressure effects on in vivo microbial processes. *Biochim Biophys Acta - Protein*  
783 *Struct Mol Enzymol* 2002; **1595**: 367–381.
- 784 93. Siliakus MF, van der Oost J, Kengen SWM. Adaptations of archaeal and bacterial membranes  
785 to variations in temperature, pH and pressure. *Extremophiles* 2017; **21**: 651–670.
- 786 94. Severi E, Müller A, Potts JR, Leech A, Williamson D, Wilson KS, et al. Sialic Acid  
787 Mutarotation Is Catalyzed by the *Escherichia coli*  $\beta$ -Propeller Protein YjhT. *J Biol Chem* 2008;  
788 **283**: 4841–4849.
- 789 95. Ophir T, Gutnick DL. A Role for Exopolysaccharides in the Protection of Microorganisms  
790 from Desiccation. *Appl Environ Microbiol* 1994; **60**: 740–745.
- 791 96. Higgins MJ, Polcik M, Fukuma T, Sader JE, Nakayama Y, Jarvis SP. Structured Water Layers  
792 Adjacent to Biological Membranes. *Biophys J* 2006; **91**: 2532–2542.
- 793 97. Disalvo EA, Lairion F, Martini F, Tymczyszyn E, Frías M, Almaleck H, et al. Structural and  
794 functional properties of hydration and confined water in membrane interfaces. *Biochim*  
795 *Biophys Acta - Biomembr* 2008; **1778**: 2655–2670.
- 796 98. Disalvo A, de los Angeles Frias M. The Role of Water in the Responsive Properties in Lipid  
797 Interphase of Biomimetic Systems. *Liposomes - Advances and Perspectives*. 2019.  
798 IntechOpen.
- 799 99. Martinez N, Michoud G, Cario A, Ollivier J, Franzetti B, Jebbar M, et al. High protein  
800 flexibility and reduced hydration water dynamics are key pressure adaptive strategies in  
801 prokaryotes. *Sci Rep* 2016; **6**: 32816.
- 802 100. Muñoz-Marín MC, Gómez-Baena G, López-Lozano A, Moreno-Cabezuelo JA, Díez J, García-  
803 Fernández JM. Mixotrophy in marine picocyanobacteria: use of organic compounds by  
804 *Prochlorococcus* and *Synechococcus*. *ISME J* 2020; **14**: 1065–1073.
- 805 101. Michoud G, Jebbar M. High hydrostatic pressure adaptive strategies in an obligate piezophile

- 806 Pyrococcus yayanosii. *Sci Rep* 2016; **6**: 27289.
- 807 102. Cario A, Lormières F, Xiang X, Oger P. High hydrostatic pressure increases amino acid  
808 requirements in the piezo-hyperthermophilic archaeon *Thermococcus barophilus*. *Res*  
809 *Microbiol* 2015; **166**: 710–716.
- 810 103. Amrani A, Bergon A, Holota H, Tamburini C, Garel M, Ollivier B, et al. Transcriptomics  
811 Reveal Several Gene Expression Patterns in the Piezophile *Desulfovibrio hydrothermalis* in  
812 Response to Hydrostatic Pressure. *PLoS One* 2014; **9**: e106831.
- 813 104. Amrani A, van Helden J, Bergon A, Aouane A, Ben Hania W, Tamburini C, et al. Deciphering  
814 the adaptation strategies of *Desulfovibrio piezophilus* to hydrostatic pressure through  
815 metabolic and transcriptional analyses. *Environ Microbiol Rep* 2016; **8**: 520–526.
- 816 105. Empadinhas N, Da Costa MS. Osmoadaptation mechanisms in prokaryotes: Distribution of  
817 compatible solutes. *Int Microbiol* . 2008.
- 818 106. Mhatre SS, Kaufmann S, Marshall IPG, Obrochta S, Andr en T, J rgensen BB, et al. Microbial  
819 biomass turnover times and clues to cellular protein repair in energy-limited deep Baltic Sea  
820 sediments. *FEMS Microbiol Ecol* 2019.
- 821 107. Bradley JA, Amend JP, LaRowe DE. Survival of the fewest: Microbial dormancy and  
822 maintenance in marine sediments through deep time. *Geobiology* 2019; **17**: 43–59.
- 823 108. Rodrigues M V., Borges N, Henriques M, Lamosa P, Ventura R, Fernandes C, et al.  
824 Bifunctional CTP:Inositol-1-Phosphate Cytidylyltransferase/CDP-Inositol:Inositol-1-  
825 Phosphate Transferase, the Key Enzyme for Di-myo-Inositol-Phosphate Synthesis in Several  
826 (Hyper)thermophiles. *J Bacteriol* 2007; **189**: 5405–5412.
- 827 109. Gonalves LG, Borges N, Serra F, Fernandes PL, Dopazo H, Santos H. Evolution of the  
828 biosynthesis of di-myo-inositol phosphate, a marker of adaptation to hot marine environments.  
829 *Environ Microbiol* 2012; **14**: 691–701.
- 830 110. Empadinhas N, da Costa MS. Diversity, biological roles and biosynthetic pathways for sugar-  
831 glycerate containing compatible solutes in bacteria and archaea. *Environ Microbiol* 2011; **13**:  
832 2056–2077.
- 833 111. Ren M, Feng X, Huang Y, Wang H, Hu Z, Clingenpeel S, et al. Phylogenomics suggests  
834 oxygen availability as a driving force in Thaumarchaeota evolution. *ISME J* 2019; **13**: 2150–  
835 2161.
- 836 112. Biller SJ, Mosier AC, Wells GF, Francis CA. Global Biodiversity of Aquatic Ammonia-  
837 Oxidizing Archaea is Partitioned by Habitat. *Front Microbiol* 2012; **3**.
- 838 113. Li M, Baker BJ, Anantharaman K, Jain S, Breier JA, Dick GJ. Genomic and transcriptomic  
839 evidence for scavenging of diverse organic compounds by widespread deep-sea archaea. *Nat*  
840 *Commun* 2015; **6**: 8933.
- 841 114. Kazutaka Katoh DMS. MAFFT Multiple Sequence Alignment Software Version 7:  
842 Improvements in Performance and Usability. *Mol Biol Evol* 2013; **30**: 772.

- 843 115. Katoh K, Standley DM. MAFFT: iterative refinement and additional methods. *Methods Mol*  
844 *Biol* 2014; **1079**: 131–146.
- 845 116. Price MN, Dehal PS, Arkin AP. Fasttree: Computing large minimum evolution trees with  
846 profiles instead of a distance matrix. *Mol Biol Evol* 2009.
- 847
- 848
- 849
- 850
- 851
- 852
- 853
- 854
- 855
- 856
- 857
- 858
- 859
- 860
- 861
- 862
- 863
- 864
- 865
- 866
- 867
- 868
- 869
- 870
- 871
- 872



873 **Figure and Table legends**

874

875 **Table 1. Statistics of deep marine sediments-derived MAGs.**

876 High-quality MAGs (> 80 % completeness and ~ 5% contamination or below) are marked with an  
877 asterisk symbol.

878

879 **Fig. 1. Study sites and the community structure of AOA.**

880 (a) Global bathymetric map showing the coring locations of the sediment cores used in this study,  
881 modified after [19]. The dark blue and light blue regions represent the minimum and maximum areas  
882 over which dissolved O<sub>2</sub> is expected to penetrate throughout the sediment from seafloor to basement.

883 (b) AOA community structure based on the 16S rRNA gene phylogeny. *Nitrosopumilaceae* 16S rRNA  
884 gene OTUs were classified based on their placements in the phylogenetic tree as described in [14]. In  
885 the figure key, the corresponding clades of the AOA *amoA* gene are shown in red. They are based on  
886 [55] and our phylogenetic analyses (unpublished data). The sediment horizons selected for metagenome  
887 sequencing are highlighted by orange stars. Data for NP\_U1383E and GS14-GC08 were retrieved from  
888 [12].

889

890 **Figure 2 a) Phylogenomic tree of AOA and non-AOA Thaumarchaeota.**

891 The phylogenomic tree was reconstructed based on the concatenated alignment of 79 markers  
892 comprising 7,485 amino acid sites using a maximum likelihood approach (see Materials and methods).  
893 Yellow circles represent 100 % bootstrap support of nodes. The metagenome-assembled genomes  
894 (MAGs) reported in this study are shown in bold. Representative genomes of NP-subclades were added  
895 for subclade clarification. Information about the ecological distribution of AOA clades is provided. The  
896 scale bar indicates the number of substitutions per amino acid site. In most cases congruence between  
897 *amoA*-based and 16S rRNA-based clades was inferred from complete genomes or MAGs where both  
898 genes were present [14, 22, 23]. For other cases: 1) *amoA*-NP-iota/16S-NP-lambda pair: the congruence  
899 of these two clades is inferred from phylogenetic trees and congruence in relative abundances (Zhao  
900 and Jorgensen, unpublished data) of sediment layers with high and changing relative abundances; 2)  
901 *amoA*-NP-delta/16S-NP-epsilon,-zeta pair: The congruence of these two clades is based on the MAG  
902 of CSP1 (with both genes), the close relationship of 16S-NP-epsilon with CSP1 and the occurrence  
903 pattern of this clade in marine sediments (see [12], and data not shown); and 3) *amoA*-NP-theta/16S-  
904 NP-alpha,-eta,-upsilon pair: congruence based on [14], own phylogenetic reconstructions (unpublished  
905 data) and relative abundances in marine sediment layers. Abbreviations: NA; not assigned.

906 **b) Phylogeny of *amoA* sequences.** The ML phylogenetic tree was reconstructed using 584 nucleotide  
907 sites. Colored circles represent MAGs from this study. The star symbol represents the  
908 NPMR\_NP\_delta\_1 bin. The incongruity of its phylogenetic placement based on the *amoA* gene and  
909 the phylogenomic analysis of concatenated markers is discussed in the text. Greek letters represent the

910 *amoA*-based annotation of AOA subclades as in [28]. The scale bar indicates the number of  
911 substitutions per nucleotide site.

912

913 **Figure 3. Comparative analysis of the presence/absence of protein clusters among AOA.**

914 Each bar (x axis) represents that the putative protein family is encoded in the genome (y axis).

915 10, 422 clusters with at least two different genomes are depicted. Non-AOA-specific clusters were  
916 excluded from the visualization. Yellow circles represent > 95 % bootstrap support of nodes. Clusters  
917 are ordered based on their distribution pattern from the most widespread to the most uncommon: first,  
918 across all lineages and then intra-lineage. Groups of clusters have different color codes for better  
919 visualization. NP represents Nitrosopumilales; NC, Nitrosocaldadales; NS, Nitrososphaerales; NT,  
920 Nitrosotaleales.

921

922 **Figure 4. Heatmap depicting the distribution and abundance of genes involved in the main  
923 functional categories discussed in the text.** Abbreviations: nit2, nitrilase/omega-amidase; ureA,

924 urease subunit gamma; fdh, formate dehydrogenase; larA, lactate racemase; pgi, phosphoglucose  
925 isomerase; proDH, proline dehydrogenase; rocA, 1-pyrroline-5-carboxylate dehydrogenase; oat,  
926 putative ornithine--oxo-glutarate aminotransferase/class III aminotransferase; kal, 3-aminobutyryl-  
927 CoA ammonia lyase; kat, putative 3-aminobutyryl-CoA aminotransferase; gvtTPH, glycine cleavage  
928 system proteins T/P/H; methH, methionine synthase II (cobalamin-independent); metE, methionine  
929 synthase I (cobalamin-dependent); APC, Amino Acid-Polyamine-Organocation Transporter Family;  
930 HAAT, the Hydrophobic Amino Acid Uptake Transporter (HAAT) Family; uvrABC, the Uvr excision  
931 repair system endonucleases ABC; udg4/5, Uracil DNA glycosylase family 4/5; mpg,  
932 methylpurine/alkyladenine-DNA glycosylase; ogg1, 8-oxoguanine DNA glycosylase; alka, DNA-3-  
933 methyladenine glycosylase; tag, 3-methyladenine DNA glycosylase; pcm, protein-L-isoaspartate  
934 carboxylmethyltransferase; nhaP, the Monovalent Cation:Proton Antiporter-1 (CPA1) Family; Trk, the  
935 K<sup>+</sup> Transporter (Trk) Family; ipct/dipps, bifunctional CTP:inositol-1-phosphate  
936 cytidyltransferase/di-myoinositol-1,3'-phosphate-1'-phosphate synthase; cspC, cold-shock protein  
937 A; cshA, cold-shock DEAD-box protein A; LLM, luciferase-like monooxygenase family protein;  
938 nanM, N-acetylneuraminic acid mutarotase; flaK, archaeal preflagellin peptidase FlaK; cheY,  
939 chemotaxis response regulator CheY; cheAB, chemotactic sensor histidine kinase cheA &  
940 methylesterase cheB; All locus tags and cluster information are in Supplementary tables 3 & 4. An  
941 extended version of the heatmap is in Fig S3

942

943 **Figure 5. Metabolic reconstruction of *amoA*-NP-theta, *amoA*-NP-delta and *amoA*-NP-iota AOA.**

944 Schematic reconstruction of the predicted metabolic modules in the sediment MAGs, as discussed in  
945 the text. Color code of enzymes/complexes indicates conservation status in AOA. Unless specified by  
946 greek letters ( $\theta\delta\iota$ ), enzymes/modules are present in all sediment clades. Dashed lines indicate

947 hypothetical reactions. Gray arrow indicates an alternative OFOR reaction. Complexes of the electron  
948 transport chain are labelled with roman numerals. Transporters are named according to TCDB  
949 classification. Enzymes, gene accession numbers and transporter classes are also listed in  
950 Supplementary Table 3. Abbreviations: Amo, ammonia monooxygenase; NirK, nitrite reductase; Nit1,  
951 nitrilase; Nit2, nitrilase/omega-amidase; AA, amino acid; Fdh, formate dehydrogenase; Kal, 3-  
952 aminobutyryl-CoA ammonia lyase; Kat, putative 3-aminobutyryl-CoA aminotransferase; Lar, lactate  
953 racemase; Pcm, protein-L-isoaspartate carboxylmethyltransferase; MCP, methyl-accepting chemotaxis  
954 protein; Fla, archaellum; PolD, polymerase family D; PolY, translesion polymerase family Y; UVR,  
955 excision repair system; Hef-like, Hef/FANCM/Mph1-like helicase; BER, base-excision repair; Udg4/5,  
956 Uracil DNA glycosylase family 4/5; Mpg, methylpurine/alkyladenine-DNA glycosylase; Ogg1, 8-  
957 oxoguanine DNA glycosylase; AlkA, DNA-3-methyladenine glycosylase; CspA, cold-shock protein A;  
958 CshA, cold-shock DEAD-box protein A; Pcm, protein-L-isoaspartate carboxylmethyltransferase; PHB,  
959 polyhydroxybutyrate; MAE, malic enzyme; OFOR, 2-oxoacid:ferredoxin oxidoreductase; PGI,  
960 phosphoglucose isomerase; IPS, myo-inositol-1-phosphate synthase; ipct/dipps, bifunctional  
961 CTP:inositol-1-phosphate cytidylyltransferase/di-myo-inositol-1,3'-phosphate-1'-phosphate synthase;  
962 IMP, DIPP phosphatase; ProDH, proline dehydrogenase; RocA, 1-pyrroline-5-carboxylate  
963 dehydrogenase; glutamate dehydrogenase; oat, putative ornithine--oxo-glutarate aminotransferase/class  
964 III aminotransferase; aspA, aspartate ammonia-lyase; ilvA, threonine/serine ammonia-lyase; glyA,  
965 serine/glycine hydroxymethyltransferase; ilvE, branched-chain-amino-acid transaminase; aspC,  
966 aspartate/tyrosine/aromatic aminotransferase; MCO1, multicopper oxidase family 1. NanM, N-  
967 acetylneuraminic acid mutarotase; Transporters are named according to TCDB classification  
968 (supplementary table 4).

969

970

971

972

Table 1

| Genome Bin           | AOA clade | Depth (m) | Depth (m below sea floor) | Contigs (No.) | Genome size (bp) | Proteins (No.) | Longest contig (bp) | N50    | GC (%) | Completeness (%) | Contamination (%) | Presence/absence of 16S rRNA gene |
|----------------------|-----------|-----------|---------------------------|---------------|------------------|----------------|---------------------|--------|--------|------------------|-------------------|-----------------------------------|
| NPMR_NP_delta_1*     | NP-delta  | 4,425     | 0.1                       | 83            | 1,173,997        | 1,467          | 79,876              | 28,788 | 34.00  | 86.23            | 5.42              | -                                 |
| NPMR_NP_delta_2      | NP-delta  | 4,425     | 0.1                       | 270           | 610,368          | 870            | 12,327              | 3,054  | 33.87  | 67.88            | 0.71              | -                                 |
| NPMR_NP_delta_3      | NP-delta  | 4,425     | 0.1                       | 143           | 937,620          | 1,222          | 58,541              | 15,484 | 34.22  | 66.29            | 3.4               | -                                 |
| NPMR_NP_theta_1*     | NP-theta  | 4,425     | 1                         | 176           | 1,524,500        | 2,000          | 40,454              | 14,847 | 35.06  | 99.51            | 2.91              | -                                 |
| NPMR_NP_theta_2*     | NP-theta  | 4,425     | 22                        | 298           | 1,201,755        | 1,671          | 26,499              | 5,123  | 34.98  | 93.69            | 4.05              | -                                 |
| YK1312_12N_NP_theta* | NP-theta  | 5,920     | 0.2                       | 299           | 1,221,321        | 1,695          | 20,455              | 5,469  | 34.08  | 88.83            | 5.34              | -                                 |
| NPMR_NP_theta_3*     | NP-theta  | 2,476     | 0.1                       | 552           | 1,069,514        | 1,706          | 14,642              | 2,738  | 34.37  | 83.58            | 3.87              | +                                 |
| NPMR_NP_theta_4      | NP-theta  | 2,476     | 0.1                       | 232           | 1,040,901        | 1,408          | 21,324              | 6,332  | 33.98  | 76.24            | 6.31              | -                                 |
| NPMR_NP_theta_5      | NP-theta  | 4,425     | 0.1                       | 274           | 697,980          | 970            | 14,641              | 3,916  | 35.14  | 75.01            | 1.21              | -                                 |
| NPMR_NP_iota_1*      | NP-iota   | 2,476     | 0.1                       | 68            | 1,121,898        | 1,402          | 75,887              | 30,338 | 35.83  | 98.54            | 0.97              | -                                 |
| YK1309_1N_NP_iota*   | NP-iota   | 4,277     | 0.3                       | 227           | 1,298,549        | 1,700          | 40,725              | 9,447  | 35.76  | 96.6             | 3.24              | -                                 |

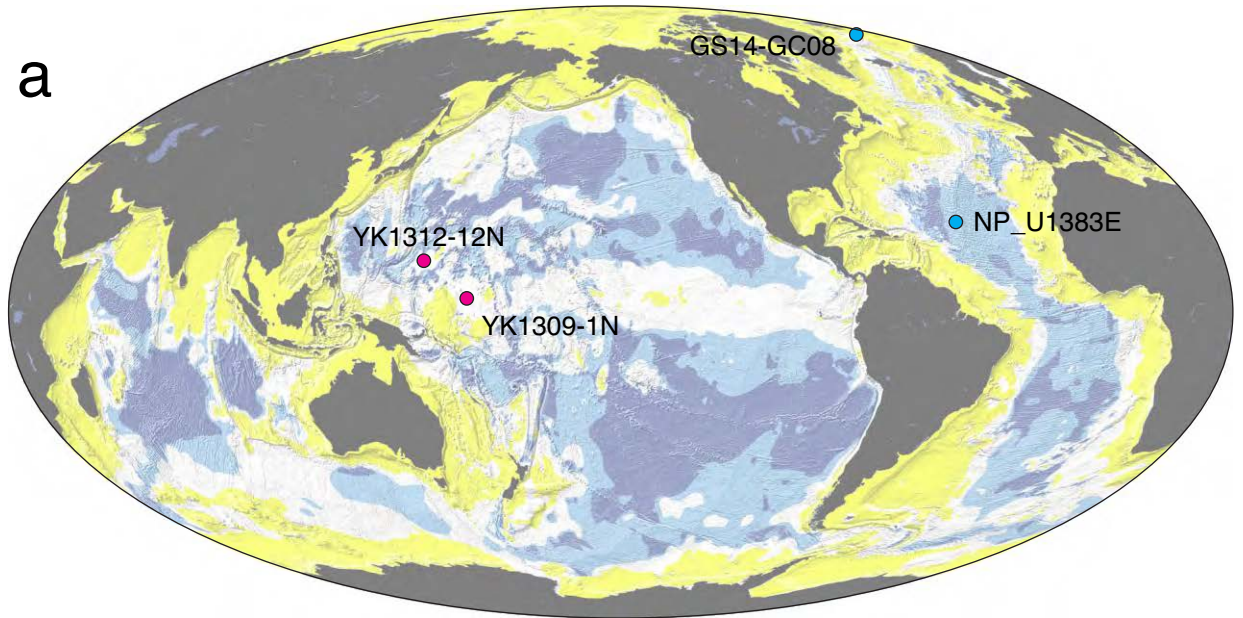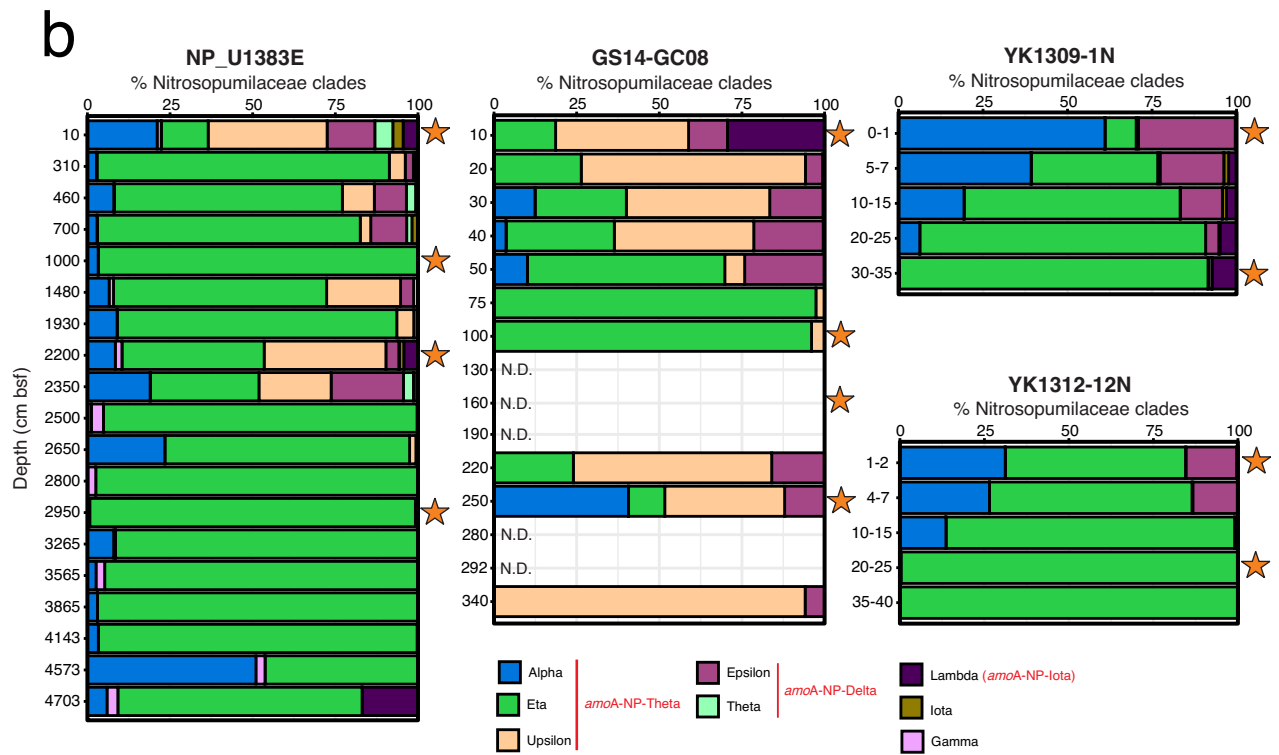

Figure 1

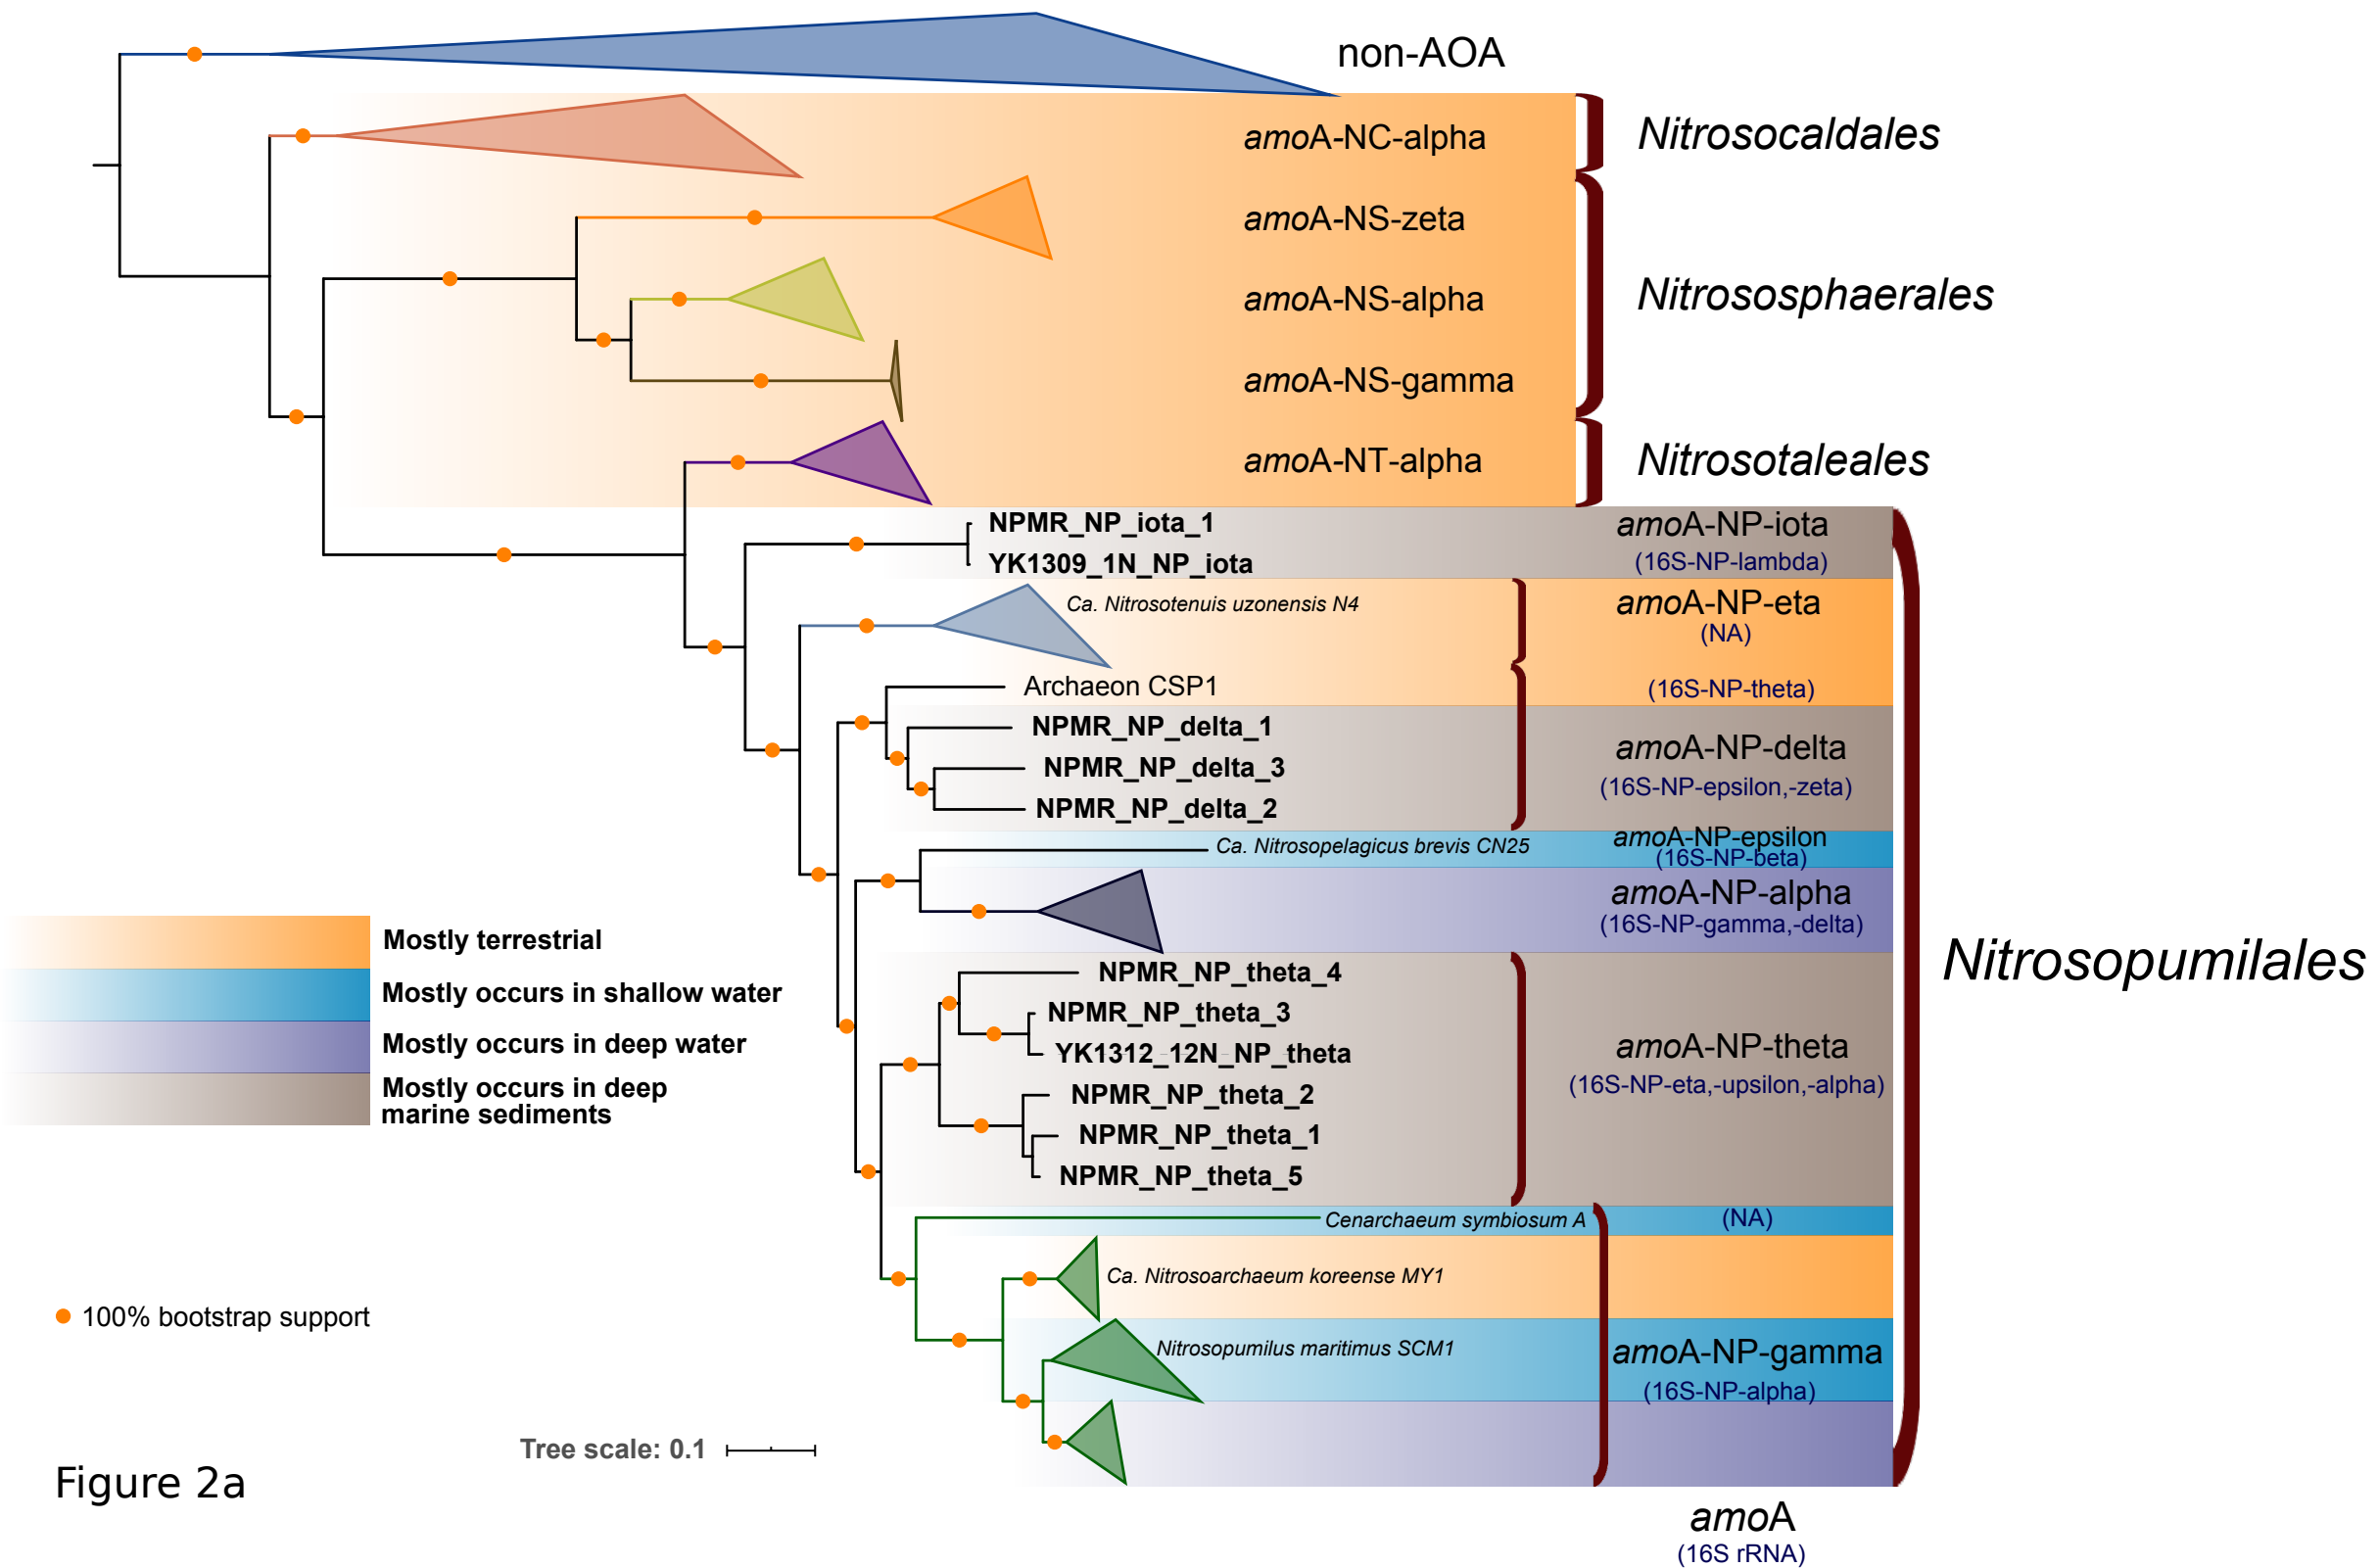

Figure 2a

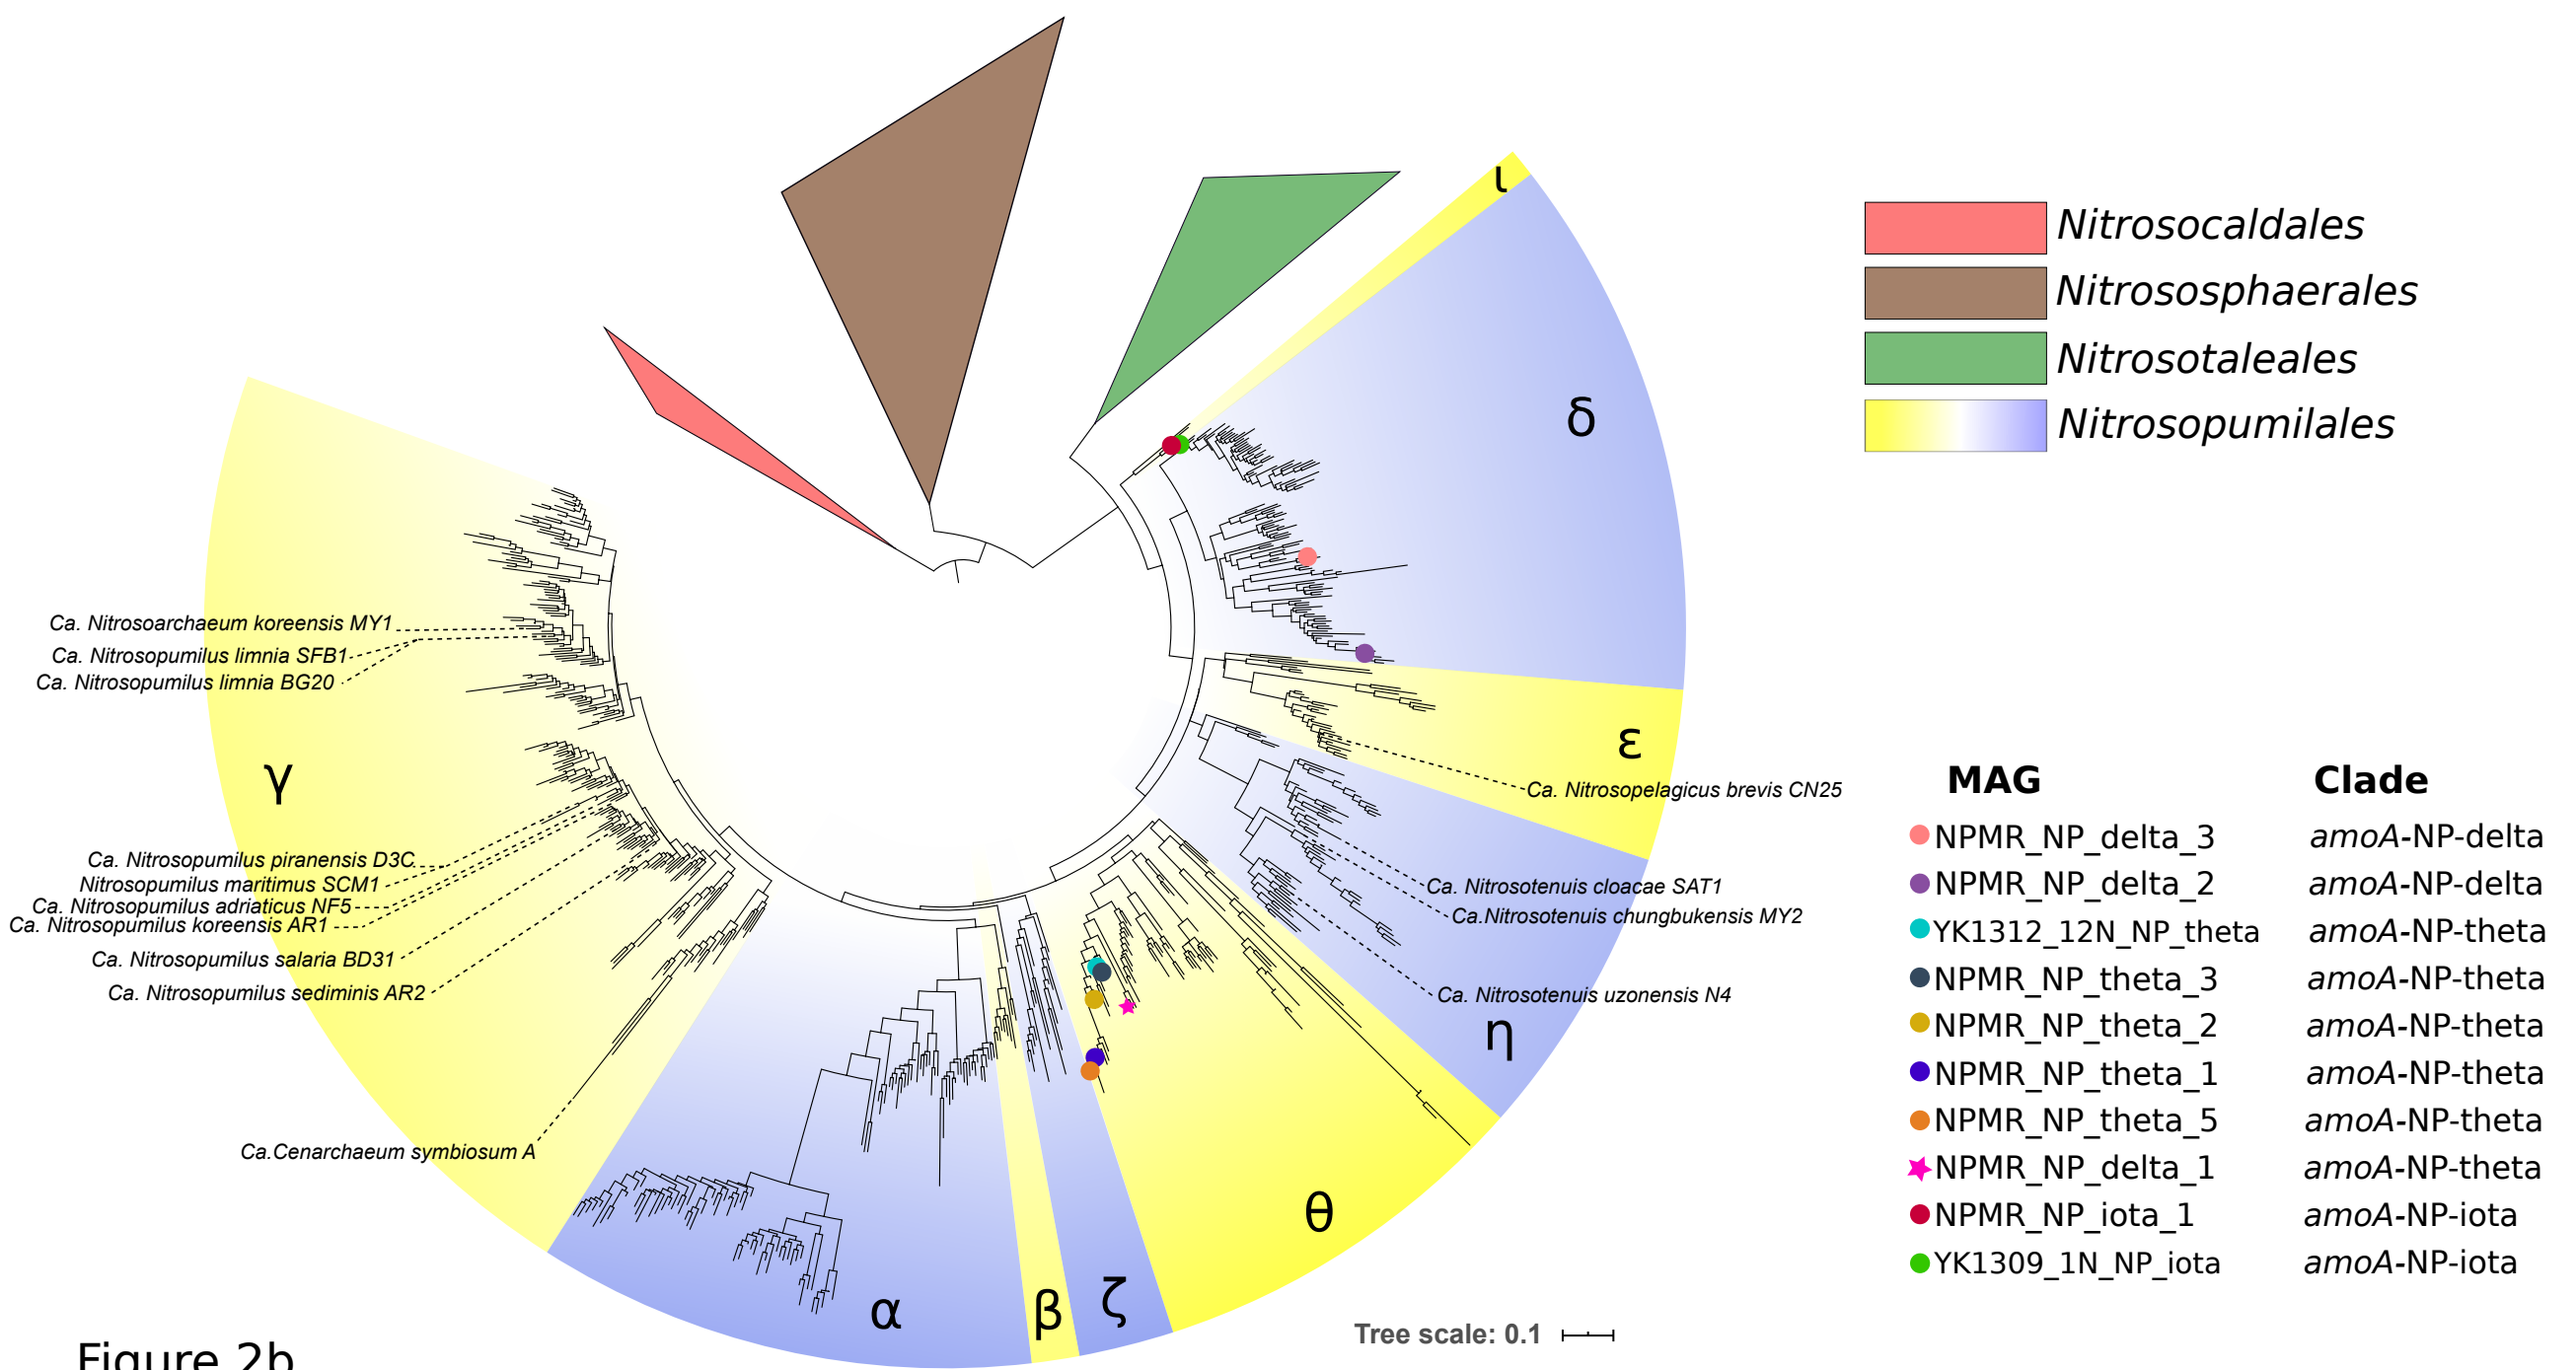

Figure 2b

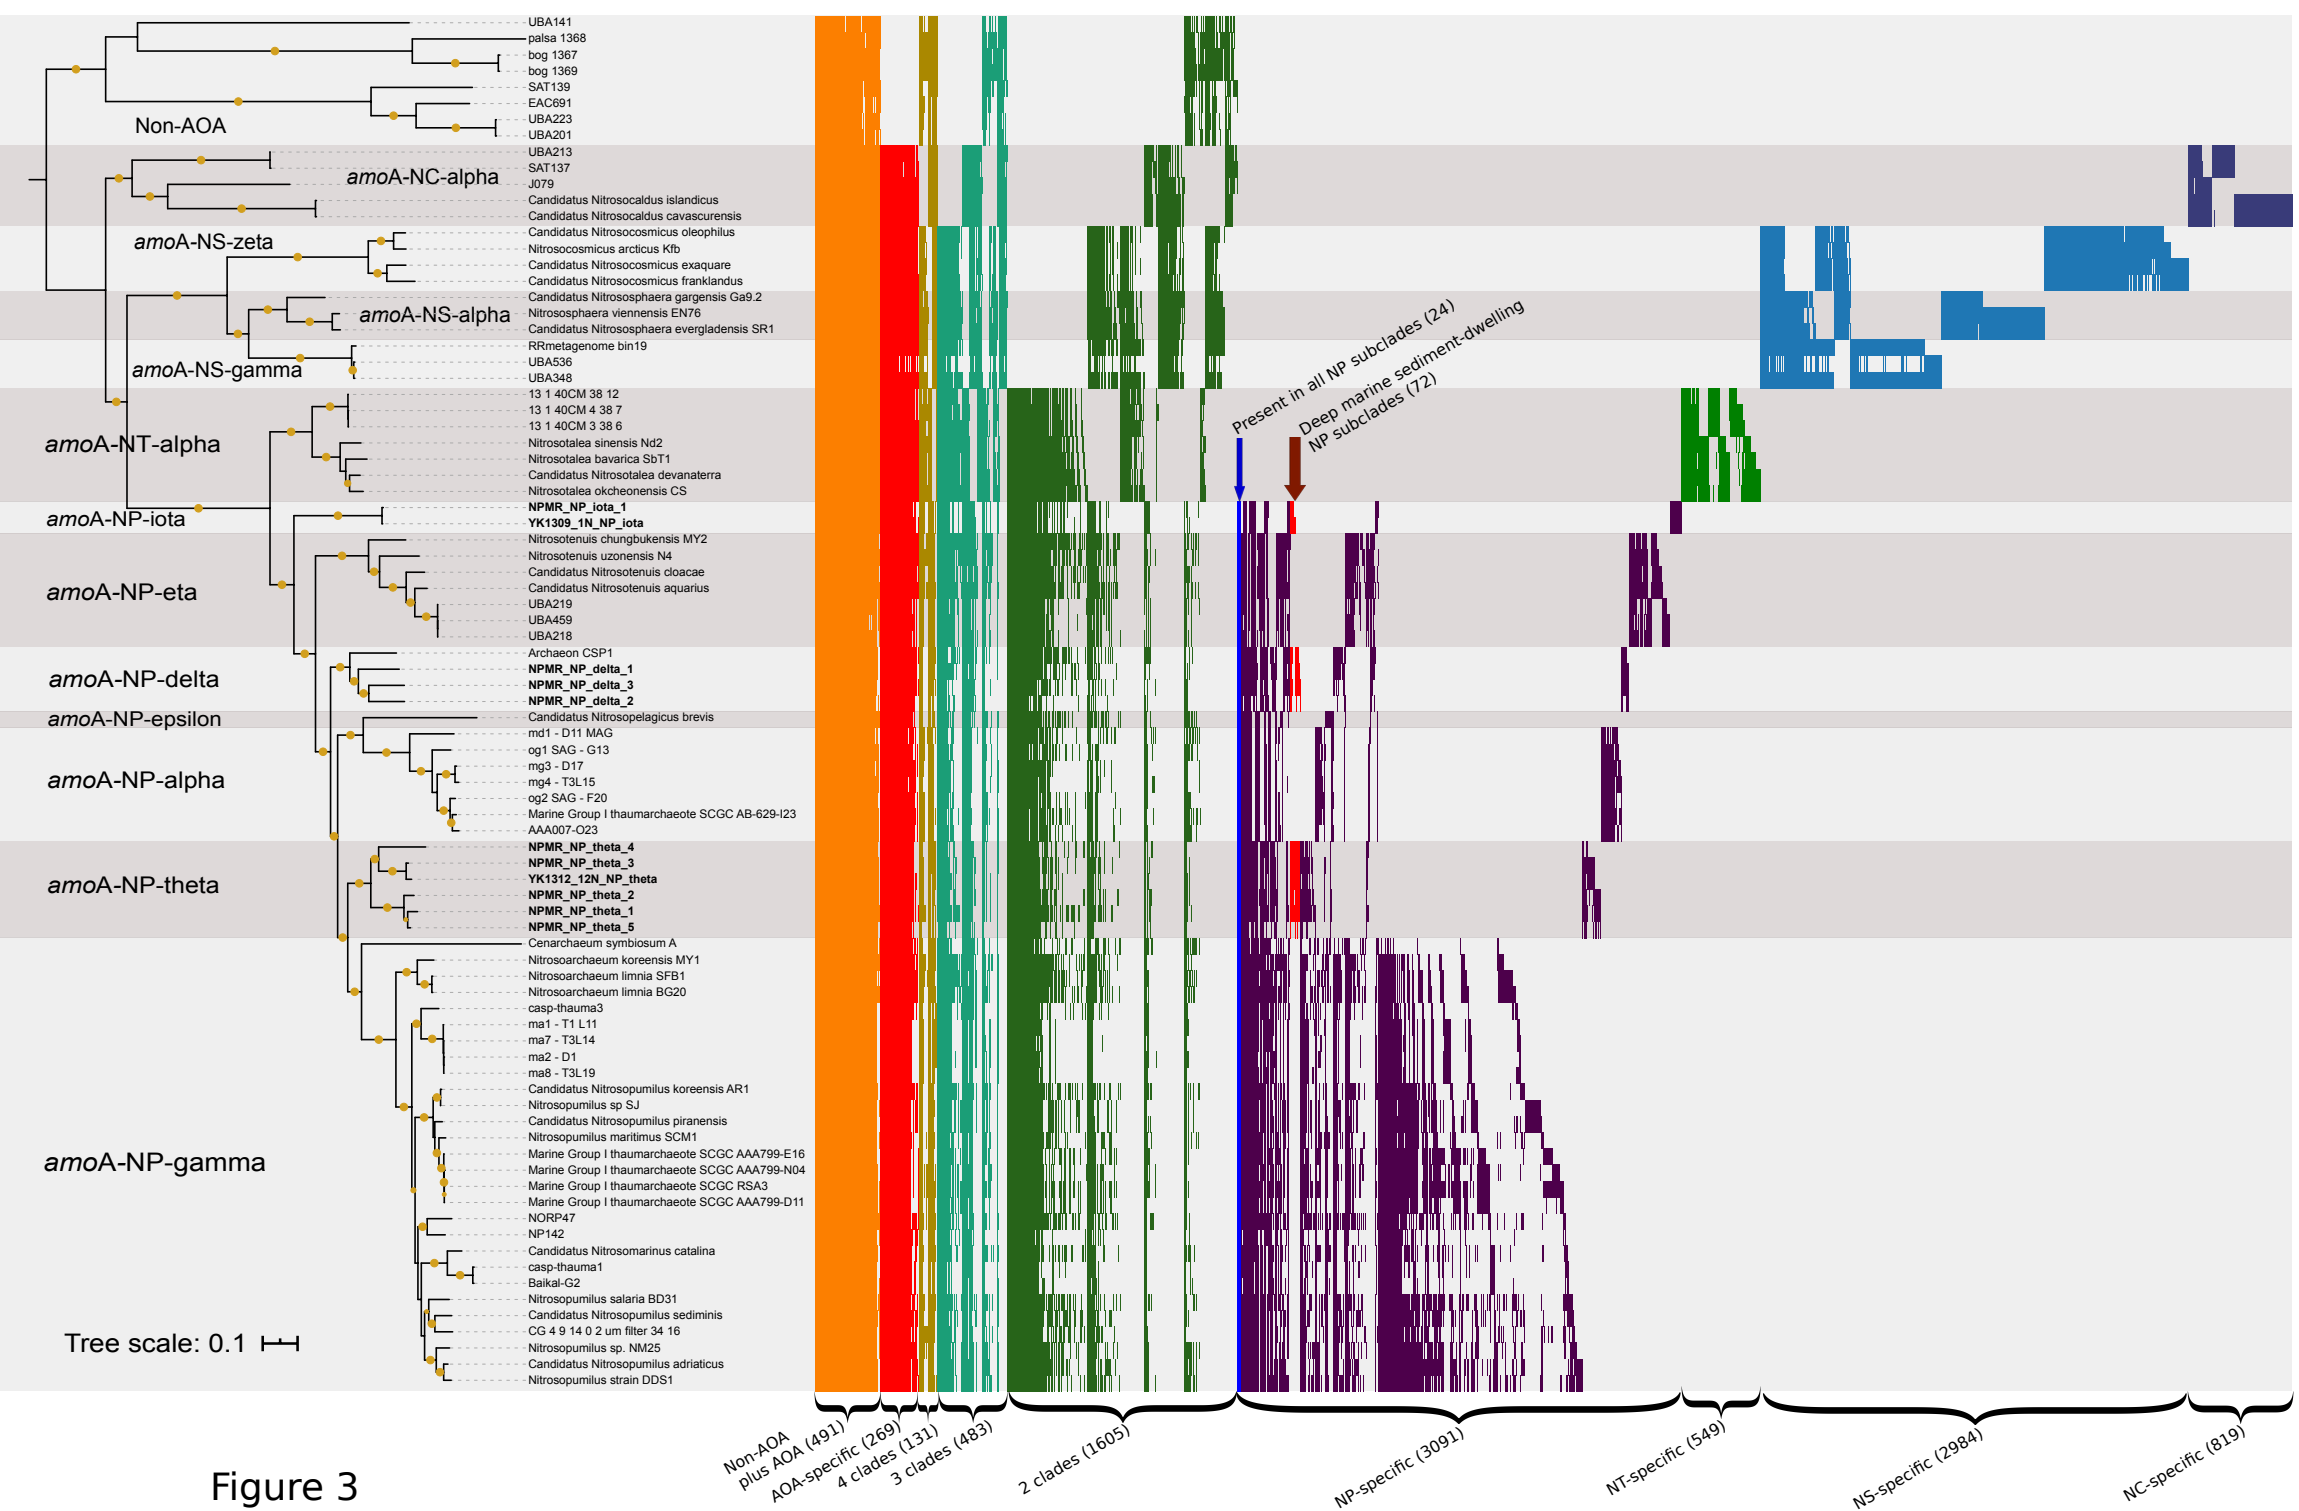

Figure 3



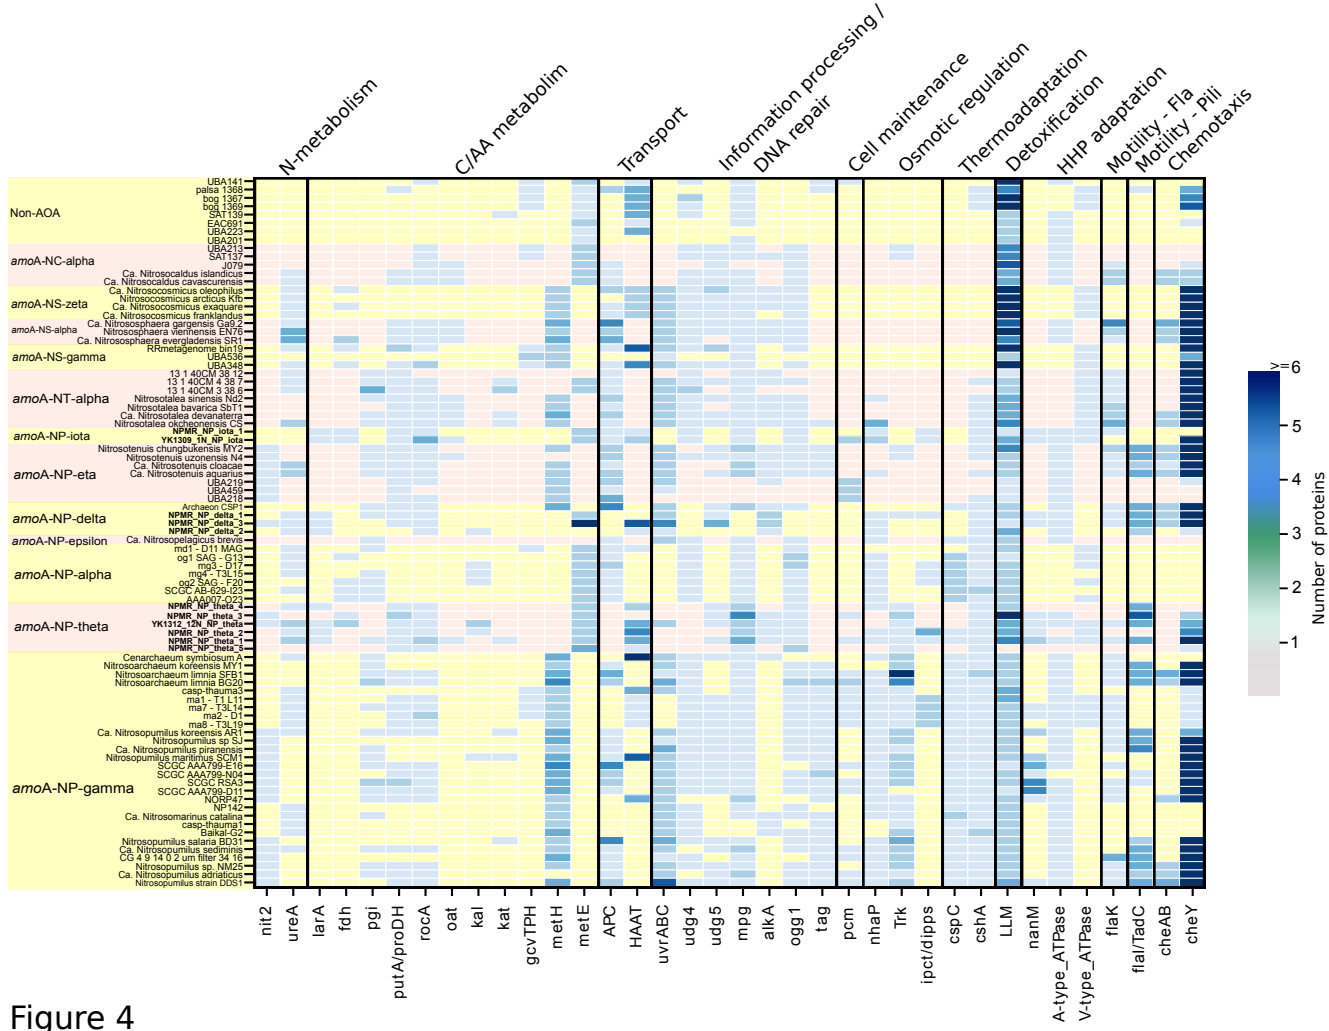

Figure 4

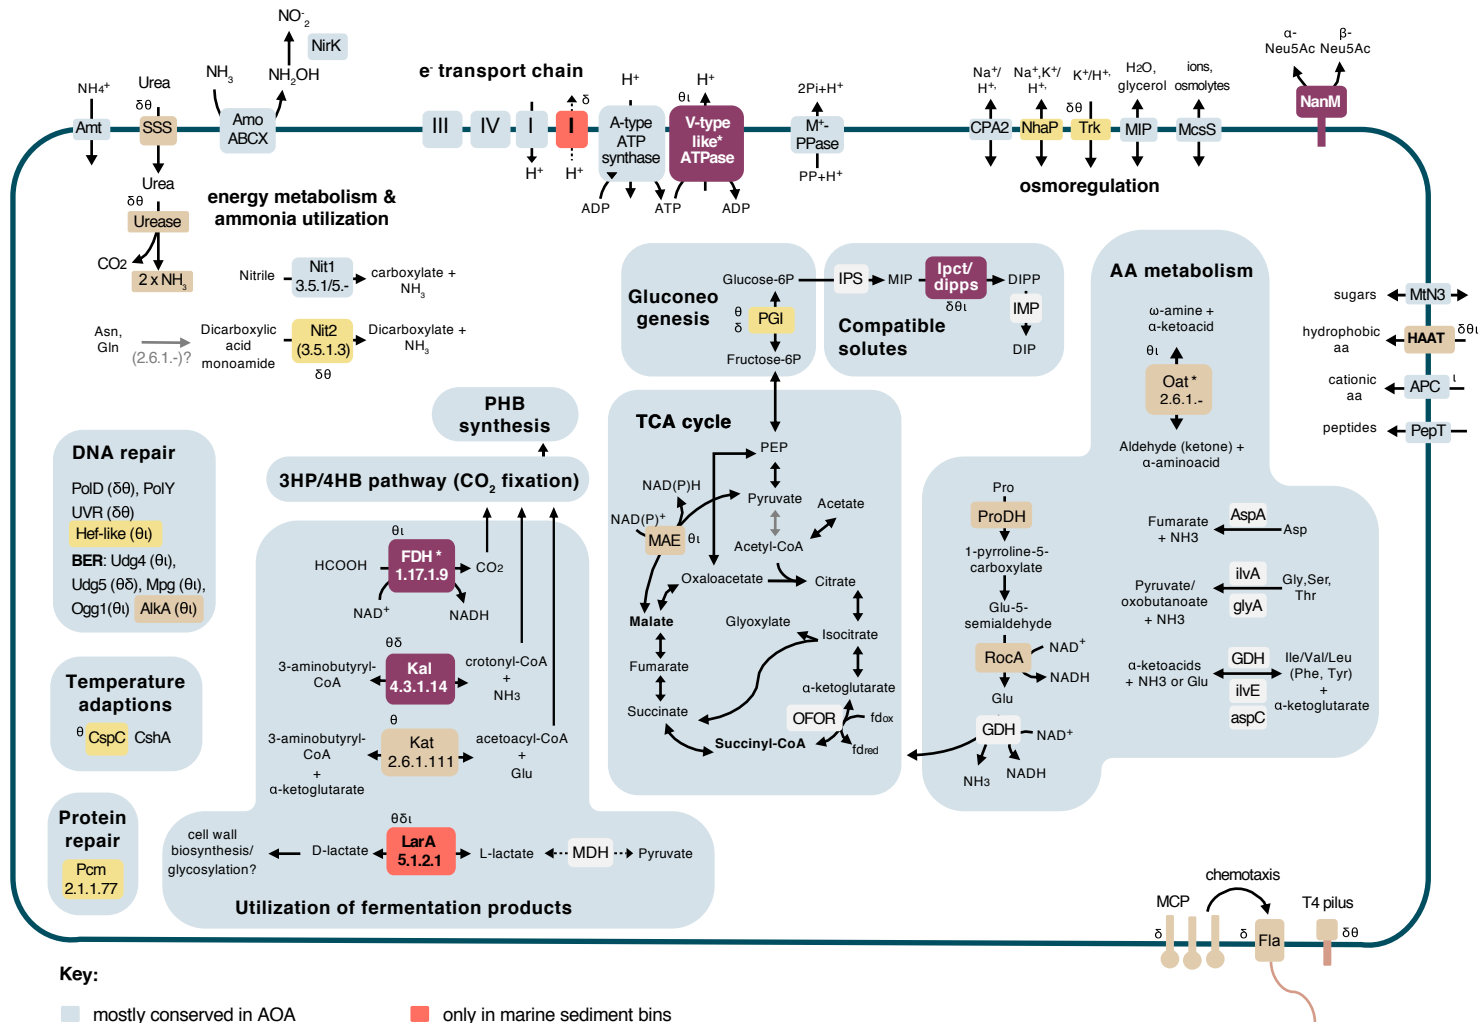

Figure 5
